# Supplementary material for: Reconstruction of the Cytokine Signaling in Lysosomal Storage Diseases by Literature Mining and Network Analysis
Source: Front Cell Dev Biol. 2021 Aug 20;9:703489. doi: 10.3389/fcell.2021.703489 (PMC8417786; doi:10.3389/fcell.2021.703489)
Supplement: Supplementary Table 2 — Selected sentences from GD literature. [file Table_2.xlsx]

## Sheet: sentences
sentence	GD type	animal	tissue/cell	from_context	verb	to_context	section	article title	journal title	cytokines	gaucher terms	genes terms	metabolites terms	pmid	cyted_by	date_published	PubMed
For example, IL6, a well-known stimulus for myeloma cells, has been reported to be elevated and associated with clonal expansion in Gaucher patients (Allen et al , 1997).	NA	patients	NA	IL6	associated	Gaucher patients	body_results	Recommendations for the management of the haematological and onco-haematological aspects of Gaucher disease.////Recommendations for the management of the haematological and onco-haematological aspects of Gaucher disease.	British journal of haematology	IL6	Gaucher patients			17655728	24	2007-09-01	https://pubmed.ncbi.nlm.nih.gov/?term=17655728
Plasma CCL18 levels have been reported to be elevated in Gaucher patients, but no definitive relationship with monoclonal gammopathies could be identified (Boot et al , 2004).	NA	patients	NA	CCL18	elevated	Gaucher patients	body_results	Recommendations for the management of the haematological and onco-haematological aspects of Gaucher disease.////Recommendations for the management of the haematological and onco-haematological aspects of Gaucher disease.	British journal of haematology	CCL18	Gaucher patients			17655728	24	2007-09-01	https://pubmed.ncbi.nlm.nih.gov/?term=17655728
Several serum proteins are consistently elevated in Gaucher disease, with some being used as biomarkers for routine monitoring, i.e., angiotensin-converting enzyme (ACE), tartrate-resistant acid phosphatase (TRAP), chitotriosidase and a chemokine, CCL18 [47 and 48].	NA	patients	NA	Gaucher disease	elevated	CCL18	body_nonstandard	A reappraisal of Gaucher disease-diagnosis and disease management algorithms.////A reappraisal of Gaucher disease-diagnosis and disease management algorithms.	American journal of hematology	CCL18	Gaucher disease			21080341	31	2011-01-01	https://pubmed.ncbi.nlm.nih.gov/?term=21080341
, IL-1ra and CCL18/PARC were elevated in Gaucher patients (p<0.05 for each).	NA	patients	NA	CCL18////PARC////IL-1ra	elevated	Gaucher patients	abstracts	Potential biomarkers of osteonecrosis in Gaucher disease.////Potential biomarkers of osteonecrosis in Gaucher disease.	Blood cells, molecules & diseases	CCL18////IL1RN	Gaucher patients			21075651	11	2011-01-01	https://pubmed.ncbi.nlm.nih.gov/?term=21075651
(B) Analysis using qPCR assays revealed greater transcriptional down-regulation of M-CSF in NSCs from Gba^−/− mice compared with that in Gba^+/− mice ( n = 4 per group).	NA	mouse model	neural stem cells	M-CSF	compared	Gba	figure_captions	Defective Self-Renewal and Differentiation of GBA-Deficient Neural Stem Cells Can Be Restored By Macrophage Colony-Stimulating Factor.////Defective Self-Renewal and Differentiation of GBA-Deficient Neural Stem Cells Can Be Restored By Macrophage Colony-Stimulating Factor.	Molecules and cells	CSF1		Gba		26282862	1	2015-09-01	https://pubmed.ncbi.nlm.nih.gov/?term=26282862
(N370S/L444P mutations), showed that Gaucher’s MSCs have a marked increase in COX-2, prostaglandin E_2 , IL-8, and CCL2 production compared with normal controls (Campeau et al., 2009).	NA	patients	mesenchymal stem cells	Gaucher	have	IL-8////CCL2	body_nonstandard	Effect of glycosphingolipids on osteoclastogenesis and osteolytic bone diseases.////Effect of glycosphingolipids on osteoclastogenesis and osteolytic bone diseases.	Frontiers in endocrinology	CXCL8////CCL2	Gaucher			22936926	2	2012-01-01	https://pubmed.ncbi.nlm.nih.gov/?term=22936926
(PARC/CCL18), of which the messenger RNA (mRNA) was previously observed to be up-regulated in the spleen of a patient with Gaucher disease (Moran et al. 2000	NA	patients	spleen	CCL18	regulated	Gaucher disease	body_nonstandard	Biomarkers in the diagnosis of lysosomal storage disorders: proteins, lipids, and inhibodies.////Biomarkers in the diagnosis of lysosomal storage disorders: proteins, lipids, and inhibodies.	Journal of inherited metabolic disease	CCL18	Gaucher disease			21445610	32	2011-06-01	https://pubmed.ncbi.nlm.nih.gov/?term=21445610
(PARC/CCL18), which are elevated by 10- to 40-fold in symptomatic patients with GD, can also be used as a biomarker.45,46	NA	patients	NA	CCL18	elevated	GD	body_nonstandard	Eliglustat tartrate for the treatment of adults with type 1 Gaucher disease.////Eliglustat tartrate for the treatment of adults with type 1 Gaucher disease.	Drug design, development and therapy	CCL18	GD			26345314	9	2015-01-01	https://pubmed.ncbi.nlm.nih.gov/?term=26345314
(sIL-2R), tumor necro sis factor-α (TNF-α), macrophage colony-stimulating factor (MCSF) and IL-6 that indicate macrophage activation also are elevated in the serum of Gaucher patients [45].	NA	patients	serum	TNF-α////MCSF////IL-6	elevated	Gaucher patients	body_nonstandard	Defective Sphingolipids Metabolism and Tumor Associated Macrophages as the Possible Links Between Gaucher Disease and Blood Cancer Development.////Defective Sphingolipids Metabolism and Tumor Associated Macrophages as the Possible Links Between Gaucher Disease and Blood Cancer Development.	International journal of molecular sciences	TNF////CSF1////IL6	Gaucher patients			30781349	2	2019-02-01	https://pubmed.ncbi.nlm.nih.gov/?term=30781349
(similar to GD type 1 patients); although there was no observable Gaucher cells, the mice showed some GD features such as lymphadenopathy, anemia and generalized inflammation marked by elevation of TNF-α and IL-1β [69].	NA	mouse model	NA	GD	marked	IL-1β////TNF-α	body_nonstandard	Induced Pluripotent Stem Cell Modeling of Gaucher's Disease: What Have We Learned?////Induced Pluripotent Stem Cell Modeling of Gaucher's Disease: What Have We Learned?	International journal of molecular sciences	IL1B////TNF	GD			28430167		2017-04-01	https://pubmed.ncbi.nlm.nih.gov/?term=28430167
^9,24 GCase treatment improved some of these MOs functional activities and reduced the numbers of peripheral blood CD4^+ T-cells in patients with Gaucher disease^24,25 and verified a contribution to its pathophysiology.^23,25 Significant increases in gene and protein expression of MOs chemo-attracting protein-1(MCP-1) or CC-chemokine ligand 2 (CCL2) were found in the lung tissue of Gba1 point-mut…	GD1	mouse model; patients	lung	GCase////CCL2////MCP-1////Gba1	reduced////found////mutated	Gaucher disease////CD4////Gba1	body_nonstandard	Immunological cells and functions in Gaucher disease.////Immunological cells and functions in Gaucher disease.	Critical reviews in oncogenesis	CD4////CCL2	Gaucher disease	GCase////////Gba1		23510064	20	2013-01-01	https://pubmed.ncbi.nlm.nih.gov/?term=23510064
256 might implicate GC in the induction of IFN-γ, TNF-α, and IL-1β leading to enhanced iNOS expression.	NA	NA	NA	GC	implicate	IFN-γ////TNF-α	body_nonstandard	Immunological cells and functions in Gaucher disease.////Immunological cells and functions in Gaucher disease.	Critical reviews in oncogenesis	IFNG////TNF			GC	23510064	20	2013-01-01	https://pubmed.ncbi.nlm.nih.gov/?term=23510064
9V/null mice APCs and T cells showed spontaneous as well as IFNγ, CD3/CD28 and GC induced increased positivity of CD40 and CD40L, as well as increased production of Th1 and Th17 cytokines.	NA	mouse model	antigen presenting cells; T cells	GC////IFNγ	induced	Th17 cytokines////CD40////CD40L	body_results	Immunological cell type characterization and Th1-Th17 cytokine production in a mouse model of Gaucher disease.////Immunological cell type characterization and Th1-Th17 cytokine production in a mouse model of Gaucher disease.	Molecular genetics and metabolism	Th17 cytokine////CD40////CD40LG////IFNG////Th17 cytokine////IFNG////CD40////IFNG////CD40LG			GC	22595426	12	2012-07-01	https://pubmed.ncbi.nlm.nih.gov/?term=22595426
A–D) Control and type 2 GD hiPSC macrophages were either left untreated or were treated with 100 ng/ml LPS for the indicated times, after which RT-PCR analysis was carried out to measure induction of TNF alpha (A) , IL-6 (B) , IL1-beta (C) , and IL-10 (D) mRNA.	GD2	in vitro	macrophages	type 2 GD	left////treated	IL-10////IL-6////IL1-beta	figure_captions	Gaucher iPSC-derived macrophages produce elevated levels of inflammatory mediators and serve as a new platform for therapeutic development.////Gaucher iPSC-derived macrophages produce elevated levels of inflammatory mediators and serve as a new platform for therapeutic development.	Stem cells (Dayton, Ohio)	IL10////IL6////IL1B	type 2 GD			24801745	22	2014-09-01	https://pubmed.ncbi.nlm.nih.gov/?term=24801745
A) Control, type 2-a and type 2-b GD hiPSC macrophages were incubated with recombinant GCase (0.24 U/ml), ambroxol (100 μM), isofagomine (60 μM) or vehicle (NT) for 5d, after which RT-PCR analysis was carried out to measure induction of IL-10.	GD2	in vitro	macrophages	GD	incubated	IL-10////GCase	figure_captions	Gaucher iPSC-derived macrophages produce elevated levels of inflammatory mediators and serve as a new platform for therapeutic development.////Gaucher iPSC-derived macrophages produce elevated levels of inflammatory mediators and serve as a new platform for therapeutic development.	Stem cells (Dayton, Ohio)	IL10	GD	GCase		24801745	22	2014-09-01	https://pubmed.ncbi.nlm.nih.gov/?term=24801745
Adding Gaucher erythrocyte ghosts increased mRNA concentrations of MCP2 (CCL2)	NA	NA	NA	Gaucher	increased	MCP2////CCL2	body_results	Macrophage models of Gaucher disease for evaluating disease pathogenesis and candidate drugs.////Macrophage models of Gaucher disease for evaluating disease pathogenesis and candidate drugs.	Science translational medicine	CCL8////CCL2	Gaucher			24920659	47	2014-06-01	https://pubmed.ncbi.nlm.nih.gov/?term=24920659
Additionally, IFNγ, IL-4, and MCSF (Table 1), which are critical for differentiation of MOs to MΦ and DC subsets,^17,30–32 had increased expression and could facilitate the MOs transformation to inflammatory subsets of MΦs and DCs in Gaucher disease.	NA	in vitro	macrophages	IFNγ////MCSF	facilitate	Gaucher disease	body_nonstandard	Immunological cells and functions in Gaucher disease.////Immunological cells and functions in Gaucher disease.	Critical reviews in oncogenesis	IFNG////CSF1	Gaucher disease			23510064	20	2013-01-01	https://pubmed.ncbi.nlm.nih.gov/?term=23510064
All three biomarkers—chitotriosidase, CCL18, and glucosylsphingosine—are closely related within the context of GD: they vary in the same direction and are generally correlated [148].	NA	NA	NA	glucosylsphingosine////CCL18	related	GD	body_nonstandard	A Review of Gaucher Disease Pathophysiology, Clinical Presentation and Treatments.////A Review of Gaucher Disease Pathophysiology, Clinical Presentation and Treatments.	International journal of molecular sciences	CCL18	GD		glucosylsphingosine	28218669	64	2017-02-01	https://pubmed.ncbi.nlm.nih.gov/?term=28218669
Also, a marked increase in the expression of CCL2 has been documented in bone marrow mesenchymal stromal cells from an adult patient with Gaucher disease type 1 [157] and in cerebrospinal fluids of patients with the severe infantile phenotype of gangliosidoses (Tay-Sachs disease, Sandhoff disease, and GM1-gangliosidosis) [113] as well as in the brain of the Gba^flox/flox ; nestin-Cre [121] and He…	GD1	mouse model; patients	bone marrow; brain	CCL2	documented////expression	Gba	body_introduction	Glycosphingolipids and neuroinflammation in Parkinson's disease.	Molecular neurodegeneration	CCL2		Gba		33069254		2020-10-01	https://pubmed.ncbi.nlm.nih.gov/?term=33069254
Alternatively activated macrophages with anti-inflammatory properties are considered M2, whereas M1 refer to classically activated macrophages which secrete pro-inflammatory cytokines such as IL-6 and TNFα, both of which are elevated in Gaucher disease and insulin resistance.	NA	NA	NA	cytokines////IL-6////TNFα	elevated	Gaucher disease	body_nonstandard	Sphingolipids: the nexus between Gaucher disease and insulin resistance.////Sphingolipids: the nexus between Gaucher disease and insulin resistance.	Lipids in health and disease	x_cytokine////IL6////TNF	Gaucher disease			20937139	11	2010-10-01	https://pubmed.ncbi.nlm.nih.gov/?term=20937139
Although chitotriosidase and CCL18 are elevated in patients with GD relative to healthy controls and decrease during disease-specific treatment [22,23,24,25,26,27,28], neither biomarker is central to disease pathophysiology [24].	NA	NA	NA	CCL18	elevated	GD	body_introduction	Value of Glucosylsphingosine (Lyso-Gb1) as a Biomarker in Gaucher Disease: A Systematic Literature Review.	International journal of molecular sciences	CCL18	GD			32998334		2020-09-01	https://pubmed.ncbi.nlm.nih.gov/?term=32998334
Among non-splenectomized patients, we observed significantly lower levels of MIP-1α, MIP-1β, and TNFα in ERT-treated versus untreated GD1 patients (Fig 4).	NA	patients	NA	TNFα////MIP-1β////MIP-1α	treated	GD1 patients	body_conclusions	The influence of genetic variability and proinflammatory status on the development of bone disease in patients with Gaucher disease.////The Influence of Genetic Variability and Proinflammatory Status on the Development of Bone Disease in Patients with Gaucher Disease.	PloS one	TNF////CCL4////CCL3	GD1 patients			25978039	7	2015-01-01	https://pubmed.ncbi.nlm.nih.gov/?term=25978039
and Ifna2 mRNA levels were also elevated (~20 and ~2-fold, respectively) in the cerebral cortex of Gba^−/− mice	NA	mouse model	cerebral cortex	Ifna2	elevated	Gba	body_results	Induction of the type I interferon response in neurological forms of Gaucher disease.////Induction of the type I interferon response in neurological forms of Gaucher disease.	Journal of neuroinflammation	IFNA2		Gba		27175482	10	2016-05-01	https://pubmed.ncbi.nlm.nih.gov/?term=27175482
As previously alluded to, the GD mice we used are known to exhibit systemic inflammation with a complex pattern of infiltration of immune cells in organs, including both IFNγ-regulated pro-inflammatory and IL-4-regulated anti-inflammatory networks, which can be reversed by enzyme replacement therapy [57,58,61,65,114].	NA	mouse model	NA	GD mice	exhibit	IL-4////IFNγ	body_nonstandard	Are Glucosylceramide-Related Sphingolipids Involved in the Increased Risk for Cancer in Gaucher Disease Patients? Review and Hypotheses.	Cancers	IL4////IFNG	GD mice			32085512	1	2020-02-01	https://pubmed.ncbi.nlm.nih.gov/?term=32085512
As shown in Fig. 2A, untreated type 2 GD hiPSC macrophages from two different patients secreted nearly 6-fold higher levels of TNF alpha than control cells, and LPS treatment magnified this difference.	GD2	in vitro	macrophages	type 2 GD	secreted	TNF alpha	body_results	Gaucher iPSC-derived macrophages produce elevated levels of inflammatory mediators and serve as a new platform for therapeutic development.////Gaucher iPSC-derived macrophages produce elevated levels of inflammatory mediators and serve as a new platform for therapeutic development.	Stem cells (Dayton, Ohio)	TNF	type 2 GD			24801745	22	2014-09-01	https://pubmed.ncbi.nlm.nih.gov/?term=24801745
As shown in Figs. 5A, 5B, 5C, treatment of GD macrophages with these three agents sharply inhibited the LPS-induced expression of TNF alpha and IL-6 to the same extent as in treated controls.	NA	in vitro	macrophages	GD	inhibited	TNF alpha	body_results	Gaucher iPSC-derived macrophages produce elevated levels of inflammatory mediators and serve as a new platform for therapeutic development.////Gaucher iPSC-derived macrophages produce elevated levels of inflammatory mediators and serve as a new platform for therapeutic development.	Stem cells (Dayton, Ohio)	TNF	GD			24801745	22	2014-09-01	https://pubmed.ncbi.nlm.nih.gov/?term=24801745
Because a number of cytokines that are important mediators of the immune response including TNF alpha, IL-6, and IL-1beta, are highly elevated in patients with GD (5, 6, 29, 30), we examined whether GD macrophages produce abnormal levels of these cytokines.	NA	patients	NA	cytokines////IL-1beta////TNF alpha////IL-6////GD	are mediators////elevated////produce////including	IL-6////IL-1beta////TNF alpha////GD////cytokines	body_results	Gaucher iPSC-derived macrophages produce elevated levels of inflammatory mediators and serve as a new platform for therapeutic development.////Gaucher iPSC-derived macrophages produce elevated levels of inflammatory mediators and serve as a new platform for therapeutic development.	Stem cells (Dayton, Ohio)	x_cytokine////IL6////x_cytokine////IL1B////x_cytokine////TNF////x_cytokine////IL1B////TNF////IL6	GD			24801745	22	2014-09-01	https://pubmed.ncbi.nlm.nih.gov/?term=24801745
Because a significant correlation was found between homozygosity for a common promoter polymorphism of TNF-alpha and milder expression i.e. non-neuronopathic form, of Gaucher disease (versus the neuronopathic forms), this may be suggestive of an association between genetic variability in TNF-alpha and phenotypic expression in Gaucher disease.	GD1	patients	NA	TNF-alpha	association////promoter	Gaucher disease	abstracts	TNF-alpha levels and TNF-alpha gene polymorphism in type I Gaucher disease.////TNF-alpha levels and TNF-alpha gene polymorphism in type I Gaucher disease.	Cytokine	TNF	Gaucher disease			15919211	5	2005-07-01	https://pubmed.ncbi.nlm.nih.gov/?term=15919211
Because of the GCase defects in these cells, excess of GC accumulates and in turn activates the release of interferon-γ (IFN-γ), interleukin-4 (IL-4), IL-6, and transforming growth factor-β (TGF-β).	NA	NA	NA	GCase////IFN-γ////GC////interferon-γ////interleukin-4////IL-6////transforming growth factor////IL-4	accumulates////activates////TGF-β	GC////interleukin-4////IFN-γ////interferon-γ////IL-6////transforming growth factor////IL-4////TGF-β	figure_captions	Immunological cells and functions in Gaucher disease.////Immunological cells and functions in Gaucher disease.	Critical reviews in oncogenesis	IFNG////IL4////IL4////IFNG////IL4////IL6////IL4////Transforming Growth Factor////IL4////IL4////IL4////Transforming Growth Factor beta////IL6////Transforming Growth Factor beta////IFNG////IL6////IFNG////Transforming Growth Factor////IFNG////Transforming Growth Factor beta////IL6////Transforming Growth Factor////Transforming Growth Factor beta////Transforming Growth Factor////Transforming Growth Fa…		GCase	GC	23510064	20	2013-01-01	https://pubmed.ncbi.nlm.nih.gov/?term=23510064
Because PARC/CCL18 is a small molecule, its level in urine is proportional to the level in the circulation.47 Measurement of plasma PARC/CCL18 has been a useful additional tool to monitor changes in Gaucher cells and as a useful tool for evaluating GD patients who are CT-deficient.48	NA	patients	urine; blood	CCL18	monitor	Gaucher cells	body_nonstandard	Eliglustat tartrate for the treatment of adults with type 1 Gaucher disease.////Eliglustat tartrate for the treatment of adults with type 1 Gaucher disease.	Drug design, development and therapy	CCL18	Gaucher cells			26345314	9	2015-01-01	https://pubmed.ncbi.nlm.nih.gov/?term=26345314
Biomarkers, such as C-C motif chemokine ligand (CCL18/PARC), angiotensin-converting enzyme (ACE), tartrate-resistant acid phosphatase 5b (TRAP5b), and C-terminal telopeptide of type 1 collagen (CTx), may lead to the diagnosis of a GD case, but the quantitation of these compounds generally lack sensitivity and most of them are not specific to GD [12,13,14,15,16].	NA	patients	NA	PARC////C-C////CCL18	lead	GD	body_introduction	Identification of a Reliable Biomarker Profile for the Diagnosis of Gaucher Disease Type 1 Patients Using a Mass Spectrometry-Based Metabolomic Approach.	International journal of molecular sciences	CCL18////CXCR1	GD			33114153		2020-10-01	https://pubmed.ncbi.nlm.nih.gov/?term=33114153
By multiple linear regression, the strongest predictors of lyso-GL1 were age (P < 0.001), splenectomy (P = 0.02), Chitotriosidase (P < 0.001) and CCL18 levels (P = 0.001).	NA	NA	NA	lyso-GL1	were	CCL18	abstracts	Glucosylsphingosine is a key biomarker of Gaucher disease.////Glucosylsphingosine is a key biomarker of Gaucher disease.	American journal of hematology	CCL18			lyso-GL1	27441734	32	2016-11-01	https://pubmed.ncbi.nlm.nih.gov/?term=27441734
CCL18 has been a useful additional tool to monitor changes in Gaucher cells and as a useful tool for evaluating GD patients who are CT-deficient.48	NA	patients	gaucher cells	CCL18	been////monitor	GD patients////Gaucher cells	body_nonstandard	Eliglustat tartrate for the treatment of adults with type 1 Gaucher disease.////Eliglustat tartrate for the treatment of adults with type 1 Gaucher disease.	Drug design, development and therapy	CCL18	GD patients////Gaucher cells			26345314	9	2015-01-01	https://pubmed.ncbi.nlm.nih.gov/?term=26345314
Changes in levels of cytokines such as IL-6 and TNF-α influence bone remodeling cells that appear to be relevant to the development of osteopenia in GD1.	GD1	NA	NA	IL-6////cytokines	be relevant	GD1	body_introduction	The influence of genetic variability and proinflammatory status on the development of bone disease in patients with Gaucher disease.////The Influence of Genetic Variability and Proinflammatory Status on the Development of Bone Disease in Patients with Gaucher Disease.	PloS one	IL6////x_cytokine	GD1			25978039	7	2015-01-01	https://pubmed.ncbi.nlm.nih.gov/?term=25978039
Chitotriosidase activity and CCL18 concentration are interchangeably used for monitoring Gaucher disease (GD) activity, together with clinical assessment.	NA	NA	NA	CCL18	used	Gaucher disease////GD	abstracts	Accuracy of chitotriosidase activity and CCL18 concentration in assessing type I Gaucher disease severity. A systematic review with meta-analysis of individual participant data.	Haematologica	CCL18	Gaucher disease////GD			32001533	2	2020-01-01	https://pubmed.ncbi.nlm.nih.gov/?term=32001533
Clearly, rigorous analysis of a large cohort of Gaucher patients is required to establish the value of plasma MIP-1β (or MIP-1α) as biomarker, especially its value as prognostic marker for skeletal response to therapy.	NA	patients	NA	Gaucher patients	establish	MIP-1α////MIP-1β	body_nonstandard	Biomarkers in the diagnosis of lysosomal storage disorders: proteins, lipids, and inhibodies.////Biomarkers in the diagnosis of lysosomal storage disorders: proteins, lipids, and inhibodies.	Journal of inherited metabolic disease	CCL3////CCL4	Gaucher patients			21445610	32	2011-06-01	https://pubmed.ncbi.nlm.nih.gov/?term=21445610
Co-culture of Gba^−/− NSCs with BM-MSCs resulted in the upregulation of M-CSF, IL-1ra, MCP-1, MMP-2, and MMP-3 (red squared spots).	NA	in vitro	neural stem cells	Gba////IL-1ra////M-CSF	resulted	IL-1ra////M-CSF////MCP-1	figure_captions	Defective Self-Renewal and Differentiation of GBA-Deficient Neural Stem Cells Can Be Restored By Macrophage Colony-Stimulating Factor.////Defective Self-Renewal and Differentiation of GBA-Deficient Neural Stem Cells Can Be Restored By Macrophage Colony-Stimulating Factor.	Molecules and cells	IL1RN////CSF1////CCL2////IL1RN////CCL2////CSF1////CCL2		Gba		26282862	1	2015-09-01	https://pubmed.ncbi.nlm.nih.gov/?term=26282862
Compared with controls, expression of Mcsf was significantly decreased in Gba^−/− NSCs (Fig. 4B).	NA	in vitro	neural stem cells	Mcsf	decreased	Gba	body_results	Defective Self-Renewal and Differentiation of GBA-Deficient Neural Stem Cells Can Be Restored By Macrophage Colony-Stimulating Factor.////Defective Self-Renewal and Differentiation of GBA-Deficient Neural Stem Cells Can Be Restored By Macrophage Colony-Stimulating Factor.	Molecules and cells	CSF1		Gba		26282862	1	2015-09-01	https://pubmed.ncbi.nlm.nih.gov/?term=26282862
Control and CBE-treated Gaucher macrophages were serum-starved overnight, then stimulated with IFNγ and subsequently immunostained for total STAT1 and phosphorylated STAT1.	NA	in vitro	macrophages	Gaucher	stimulated	IFNγ	body_results	Alterations in the properties of the cell membrane due to glycosphingolipid accumulation in a model of Gaucher disease.////Alterations in the properties of the cell membrane due to glycosphingolipid accumulation in a model of Gaucher disease.	Scientific reports	IFNG	Gaucher			29317695	10	2018-01-01	https://pubmed.ncbi.nlm.nih.gov/?term=29317695
Control and Gaucher-type cells were compared by two-way ANOVA followed by Tukey’s HSD test (*p < 0.05 for the difference between IFNγ-stimulated control and Gaucher cells).	NA	in vitro	gaucher cells	IFNγ	stimulated	Gaucher cells	figure_captions	Alterations in the properties of the cell membrane due to glycosphingolipid accumulation in a model of Gaucher disease.////Alterations in the properties of the cell membrane due to glycosphingolipid accumulation in a model of Gaucher disease.	Scientific reports	IFNG	Gaucher cells			29317695	10	2018-01-01	https://pubmed.ncbi.nlm.nih.gov/?term=29317695
Control THP-1-derived macrophages and those exhibiting the Gaucher phenotype were serum-starved overnight followed by a 30-min stimulation with 100 ng/ml IFN-γ.	NA	in vitro	macrophages	Gaucher	followed	IFN-γ	figure_captions	Alterations in the properties of the cell membrane due to glycosphingolipid accumulation in a model of Gaucher disease.////Alterations in the properties of the cell membrane due to glycosphingolipid accumulation in a model of Gaucher disease.	Scientific reports	IFNG	Gaucher			29317695	10	2018-01-01	https://pubmed.ncbi.nlm.nih.gov/?term=29317695
Correlations between lyso-Gb1 and CCL18 concentrations were reported in three studies [33,40,48].	NA	NA	NA	lyso-Gb1	Correlations	CCL18	body_results	Value of Glucosylsphingosine (Lyso-Gb1) as a Biomarker in Gaucher Disease: A Systematic Literature Review.	International journal of molecular sciences	CCL18			lyso-Gb1	32998334		2020-09-01	https://pubmed.ncbi.nlm.nih.gov/?term=32998334
Currently used biomarkers of Gaucher disease in the clinic include serum chitotriosidase [5] and the chemokine, PARC/CCL18 [6], both massively secreted from glucosylceramide-laden macrophages.	NA	NA	NA	Gaucher disease	include	PARC////CCL18	body_introduction	Validating glycoprotein non-metastatic melanoma B (gpNMB, osteoactivin), a new biomarker of Gaucher disease.////Validating glycoprotein non-metastatic melanoma B (gpNMB, osteoactivin), a new biomarker of Gaucher disease.	Blood cells, molecules & diseases	CCL18	Gaucher disease			28003098	10	2018-02-01	https://pubmed.ncbi.nlm.nih.gov/?term=28003098
Currently, chitotriosidase and CCL18 are the most widely used circulating biomarkers for monitoring GD status (Aerts et al. 2005).	NA	NA	NA	CCL18	are biomarkers	GD	body_introduction	Evaluation of high density lipoprotein as a circulating biomarker of Gaucher disease activity.////Evaluation of high density lipoprotein as a circulating biomarker of Gaucher disease activity.	Journal of inherited metabolic disease	CCL18	GD			21290183	2	2011-04-01	https://pubmed.ncbi.nlm.nih.gov/?term=21290183
Cytokines levels evaluated by capture ELISA in the supernatant of U87 GBA1 mutant cells showed an increased production of IL-1β without (-) or with (LPS + ATP) inflammosome activation ( A ).	NA	in vitro	U87 GBA1 mutant cells	GBA1	showed	IL-1β	figure_captions	CRISPR/Cas9 Editing for Gaucher Disease Modelling.	International journal of molecular sciences	IL1B		GBA1		32380730		2020-05-01	https://pubmed.ncbi.nlm.nih.gov/?term=32380730
Defective Self-Renewal and Differentiation of GBA-Deficient Neural Stem Cells Can Be Restored By Macrophage Colony-Stimulating Factor.	NA	NA	Neural Stem Cells	GBA	Restored	Macrophage Colony-Stimulating Factor	titles	Defective Self-Renewal and Differentiation of GBA-Deficient Neural Stem Cells Can Be Restored By Macrophage Colony-Stimulating Factor.////Defective Self-Renewal and Differentiation of GBA-Deficient Neural Stem Cells Can Be Restored By Macrophage Colony-Stimulating Factor.	Molecules and cells	CSF1		GBA		26282862	1	2015-09-01	https://pubmed.ncbi.nlm.nih.gov/?term=26282862
Despite a strong correlation between the two biomarkers [15], CCL18 has theoretically potential advantages over chitotriosidase for monitoring GD activity.	NA	NA	NA	CCL18	has	GD	body_introduction	Plasma chitotriosidase activity versus CCL18 level for assessing type I Gaucher disease severity: protocol for a systematic review with meta-analysis of individual participant data.////Plasma chitotriosidase activity versus CCL18 level for assessing type I Gaucher disease severity: protocol for a systematic review with meta-analysis of individual participant data.	Systematic reviews	CCL18	GD			28427477	4	2017-04-01	https://pubmed.ncbi.nlm.nih.gov/?term=28427477
Differentiating iPSCs derived from patients with type 1 GD into macrophages, Panicker et al. (2014) found that these GD iPSC-derived macrophages secrete greatly elevated levels of pro-inflammatory factors, including interleukin (IL)-10, IL-6, IL-1β, and tumor necrosis factor (TNF)-α, when challenged with lipopolysaccharide, a common pro-inflammatory stimulus.	GD1	in vitro	macrophages	GD	secrete	interleukin (IL)-10////TNF////tumor necrosis factor////IL-1β	body_nonstandard	Induced pluripotent stem cell models of lysosomal storage disorders.////Induced pluripotent stem cell models of lysosomal storage disorders.	Disease models & mechanisms	IL10////TNF////Tumor Necrosis Factors////IL1B	GD			28592657	6	2017-06-01	https://pubmed.ncbi.nlm.nih.gov/?term=28592657
Elevated levels of GlcCer are sensed directly or indirectly by a PRR resulting in activation of the antiviral response and production of IFNα and IFNβ.	NA	NA	NA	GlcCer	sensed	IFNβ////IFNα	figure_captions	Induction of the type I interferon response in neurological forms of Gaucher disease.////Induction of the type I interferon response in neurological forms of Gaucher disease.	Journal of neuroinflammation	IFNB1////Interferon-alpha			GlcCer	27175482	10	2016-05-01	https://pubmed.ncbi.nlm.nih.gov/?term=27175482
Elevated levels of the proinflammatory cytokines, IL-1alpha, IL-1beta, IL-6, and TNF-alpha, were detected in the fetal brains of Gaucher mice.	NA	mouse model	fetal brain	IL-6////TNF-alpha////IL-1alpha////IL-1beta////cytokines	detected	Gaucher mice	abstracts	Upregulation of proinflammatory cytokines in the fetal brain of the Gaucher mouse.////Upregulation of proinflammatory cytokines in the fetal brain of the Gaucher mouse.	Journal of Korean medical science	IL6////TNF////IL1A////IL1B////x_cytokine	Gaucher mice			16891822	14	2006-08-01	https://pubmed.ncbi.nlm.nih.gov/?term=16891822
Enhanced proliferation and neuronal differentiation of GBA-deficient NSCs was associated with elevated release of macrophage colony-stimulating factor (M-CSF) from BM-MSCs.	NA	NA	Bone marrow-derived mesenchymal stem cells	GBA	associated	M-CSF////macrophage colony-stimulating factor	abstracts	Defective Self-Renewal and Differentiation of GBA-Deficient Neural Stem Cells Can Be Restored By Macrophage Colony-Stimulating Factor.////Defective Self-Renewal and Differentiation of GBA-Deficient Neural Stem Cells Can Be Restored By Macrophage Colony-Stimulating Factor.	Molecules and cells	CSF1		GBA		26282862	1	2015-09-01	https://pubmed.ncbi.nlm.nih.gov/?term=26282862
ERT‐treated patients (GD ERT) exhibited significantly lower chitotriosidase activity and a lower level of the CCL18 chemokine compared with untreated patients (GD UT).	NA	patients	NA	GD////CCL18	exhibited////compared	CCL18////GD	body_results	Effects of sphingolipids overload on red blood cell properties in Gaucher disease.	Journal of cellular and molecular medicine	CCL18	GD			32767726	1	2020-08-01	https://pubmed.ncbi.nlm.nih.gov/?term=32767726
Evidence of increased expression of C-C and C-X-C chemokines (i.e., CCL2,CXCL1, CXCL8) in Gaucher disease could be critical for monocyte transformation to inflammatory subsets of macrophages and dendritic cells (DC) as well as neutrophil (PMNs) recruitment to visceral organs.	NA	NA	NA	CXCL8////CXCL1////CCL2////C-C	be	Gaucher disease	abstracts	Immunological cells and functions in Gaucher disease.////Immunological cells and functions in Gaucher disease.	Critical reviews in oncogenesis	CXCL8////CXCL1////CCL2////CXCR1	Gaucher disease			23510064	20	2013-01-01	https://pubmed.ncbi.nlm.nih.gov/?term=23510064
Expression analysis of GD phenotype progression in V394L/V394L and D409 V/null revealed a direct relationship between GlcCer accumulation and activation of INFγ and IL4 regulated networks [77].	NA	NA	NA	GlcCer////GD	relationship////revealed	IL4////GlcCer	body_nonstandard	Induced Pluripotent Stem Cell Modeling of Gaucher's Disease: What Have We Learned?////Induced Pluripotent Stem Cell Modeling of Gaucher's Disease: What Have We Learned?	International journal of molecular sciences	IL4	GD		GlcCer	28430167		2017-04-01	https://pubmed.ncbi.nlm.nih.gov/?term=28430167
Expression levels of M-CSF, IL-1ra, MCP-1, MMP-2 and MMP-3 were greater in the conditioned media of Gba^−/− NSCs co-cultured with BM-MSCs than in the conditioned media of NSCs without co-culture (Fig. 4A).	NA	in vitro	neural stem cells; bone marrow-derived mesenchymal stem cells	IL-1ra////M-CSF////MCP-1	were greater	Gba	body_results	Defective Self-Renewal and Differentiation of GBA-Deficient Neural Stem Cells Can Be Restored By Macrophage Colony-Stimulating Factor.////Defective Self-Renewal and Differentiation of GBA-Deficient Neural Stem Cells Can Be Restored By Macrophage Colony-Stimulating Factor.	Molecules and cells	IL1RN////CSF1////CCL2		Gba		26282862	1	2015-09-01	https://pubmed.ncbi.nlm.nih.gov/?term=26282862
F3: Correlation of serum GpNMB with other markers of GD severity: Correlation of serum GpNMB with serum Chitotriosidase Correlation of serum GpNMB with serum CCL18 Correlation of serum GpNMB with serum Lyso-GL1 (GlcSpn, glucosylsphingosine) Correlation of serum GpNMB with liver volume Correlation of serum GpNMB with spleen volume Correlation of serum GpNMB with platelet count Correlation of serum…	NA	NA	serum	CCL18////GD	Correlation	glucosylsphingosine////Lyso-GL1////CCL18	figure_captions	Validating glycoprotein non-metastatic melanoma B (gpNMB, osteoactivin), a new biomarker of Gaucher disease.////Validating glycoprotein non-metastatic melanoma B (gpNMB, osteoactivin), a new biomarker of Gaucher disease.	Blood cells, molecules & diseases	CCL18	GD		glucosylsphingosine////Lyso-GL1	28003098	10	2018-02-01	https://pubmed.ncbi.nlm.nih.gov/?term=28003098
Finally, we observed an increase of IL-8 and IL-18 in GD patient sera, which were reduced under enzyme replacement therapy.	NA	patients	serum	IL-8////IL-18	GD patient	GD patient	abstracts	Altered innate function of plasmacytoid dendritic cells restored by enzyme replacement therapy in Gaucher disease.////Altered innate function of plasmacytoid dendritic cells restored by enzyme replacement therapy in Gaucher disease.	Blood cells, molecules & diseases	CXCL8////IL18	GD patient			23357793	6	2013-04-01	https://pubmed.ncbi.nlm.nih.gov/?term=23357793
Further, lyso-GL1 was independently associated age, serum chitotriosidase, serum CCL18 and splenectomy once adjusted for each other as well as liver volume, spleen volume, hemoglobin and platelet counts.	NA	NA	serum	lyso-GL1	was age	CCL18	body_results	Glucosylsphingosine is a key biomarker of Gaucher disease.////Glucosylsphingosine is a key biomarker of Gaucher disease.	American journal of hematology	CCL18			lyso-GL1	27441734	32	2016-11-01	https://pubmed.ncbi.nlm.nih.gov/?term=27441734
Furthermore, the macrophage inflammatory proteins (MIPs) MIP-1α and MIP-1β, which have been shown to increase bone resorption by osteoclasts in multiple myeloma [8], were also elevated in GD with bone disease [9, 10]; therefore, in combination with other cytokines, MIP-1α and MIP-1β might also contribute to pathological skeletal alterations in GD1.	NA	NA	NA	MIP-1β////MIP-1α////cytokines	contribute////elevated	GD1////GD	body_introduction	The influence of genetic variability and proinflammatory status on the development of bone disease in patients with Gaucher disease.////The Influence of Genetic Variability and Proinflammatory Status on the Development of Bone Disease in Patients with Gaucher Disease.	PloS one	CCL4////CCL3////x_cytokine	GD1////GD			25978039	7	2015-01-01	https://pubmed.ncbi.nlm.nih.gov/?term=25978039
Gaucher cells are M2-like cells [71] and are surrounded in tissue lesions by macrophages expressing pro-inflammatory molecules such as IL-1β or monocyte chemoattractant protein 1 (MCP-1)	NA	NA	gaucher cells; macrophages	Gaucher cells	surrounded	monocyte chemoattractant protein 1////MCP-1////IL-1β	body_nonstandard	Glycoprotein Non-Metastatic Protein B: An Emerging Biomarker for Lysosomal Dysfunction in Macrophages.////Glycoprotein Non-Metastatic Protein B: An Emerging Biomarker for Lysosomal Dysfunction in Macrophages.	International journal of molecular sciences	CCL2////IL1B	Gaucher cells			30586924	6	2018-12-01	https://pubmed.ncbi.nlm.nih.gov/?term=30586924
Gaucher cells strongly express markers of alternative activation, such as interleukin-1 antagonist and CCL18, which are anti-inflammatory molecules.83	NA	NA	gaucher cells	Gaucher cells	express	interleukin-1////CCL18	body_nonstandard	Optimal therapy in Gaucher disease.////Optimal therapy in Gaucher disease.	Therapeutics and clinical risk management	Interleukin-1////CCL18	Gaucher cells			20668714	5	2010-07-01	https://pubmed.ncbi.nlm.nih.gov/?term=20668714
Gaucher cells, such as activated macrophages, are responsible for several cellular responses manifested in GD, like cytokines (interleukin-1b, interleukin-1 receptor antagonist, interleukin-2 receptor, CD14 and M-CSF): [21, 22].	NA	NA	gaucher cells	Gaucher cells	are////manifested////are responsible	M-CSF////interleukin-2////interleukin-1 receptor antagonist////cytokines////GD	body_introduction	Twenty- five years of biochemical diagnosis of Gaucher disease: the Egyptian experience.	Heliyon	CSF1////IL2////IL1RN////x_cytokine	Gaucher cells////Gaucher cells////GD			31720445	1	2019-10-01	https://pubmed.ncbi.nlm.nih.gov/?term=31720445
Gaucher MSCs have a typical MSC marker phenotype, normal osteocytic and adipocytic differentiation, growth, exogenous lactosylceramide trafficking, cholesterol content, lysosomal morphology, and total lysosomal content, and a marked increase in COX-2, prostaglandin E2, interleukin-8, and CCL2 production compared with normal controls.	NA	NA	mesenchymal stromal cells	Gaucher	have	interleukin-8////CCL2	abstracts	Characterization of Gaucher disease bone marrow mesenchymal stromal cells reveals an altered inflammatory secretome.////Characterization of Gaucher disease bone marrow mesenchymal stromal cells reveals an altered inflammatory secretome.	Blood	CXCL8////CCL2	Gaucher			19587377	31	2009-10-01	https://pubmed.ncbi.nlm.nih.gov/?term=19587377
Gba^−/− NSCs co-cultured with BM-MSCs exhibited greater M-CSF expression levels compared with those in Gba^−/− NSCs that were not co-cultured with BM-MSCs ( n = 5 mice per group).	NA	in vitro	neural stem cells; bone marrow-derived mesenchymal stem cells	Gba////M-CSF	exhibited////compared////NSCs	M-CSF////Gba	figure_captions	Defective Self-Renewal and Differentiation of GBA-Deficient Neural Stem Cells Can Be Restored By Macrophage Colony-Stimulating Factor.////Defective Self-Renewal and Differentiation of GBA-Deficient Neural Stem Cells Can Be Restored By Macrophage Colony-Stimulating Factor.	Molecules and cells	CSF1		Gba		26282862	1	2015-09-01	https://pubmed.ncbi.nlm.nih.gov/?term=26282862
GC addition led to the production of IFNγ (Fig. 7A), TNFα (Fig. 7B), IL-12p40 (Fig. 7C), IL12p70 (Fig. 7D), IL23(Fig. 7E), IL-6 (Fig. 7F), and IL17A/F (Fig. 7G), and decreased generation of IL-4	NA	in vitro	NA	GC////IL-12p40////TNFα////IFNγ	led////IL12p70	IL-12p40////IL17A////TNFα////IFNγ////IL-6////IL12p70	body_results	Immunological cell type characterization and Th1-Th17 cytokine production in a mouse model of Gaucher disease.////Immunological cell type characterization and Th1-Th17 cytokine production in a mouse model of Gaucher disease.	Molecular genetics and metabolism	IL12B////IL17A////TNF////IFNG////IL6////IL12B////Interleukin-12////Interleukin-12////TNF////Interleukin-12////IFNG////Interleukin-12			GC	22595426	12	2012-07-01	https://pubmed.ncbi.nlm.nih.gov/?term=22595426
GD patients have been shown to have increased serum concentrations of interleukin 6 and 10 79 whilst GBA knockout mice display upregulation of a variety of immune markers and increased levels of a variety of inflammatory cytokines in the plasma 85, 86.	NA	patients	serum	GD patients////GBA////interleukin 6	increased////display////shown	interleukin 6////cytokines////GBA	body_nonstandard	Neurological effects of glucocerebrosidase gene mutations.////Neurological effects of glucocerebrosidase gene mutations.	European journal of neurology	IL6////x_cytokine	GD patients	GBA		30315684	8	2019-03-01	https://pubmed.ncbi.nlm.nih.gov/?term=30315684
Genes for the cytokines IL-1α, IL-1β, IL-6, and TNF-α were upregulated in the cerebral cortex, brainstem, and cerebellum of Gaucher mice compared with those of wild-type mice by RT-PCR (Fig. 1A).	NA	mouse model	cerebral cortex, brainstem, and cerebellum	cytokines////IL-1α////TNF-α////IL-6////IL-1β	IL-1β IL-6////IL-1β////upregulated	IL-6////IL-1β////Gaucher mice	body_results	Upregulation of proinflammatory cytokines in the fetal brain of the Gaucher mouse.////Upregulation of proinflammatory cytokines in the fetal brain of the Gaucher mouse.	Journal of Korean medical science	x_cytokine////IL6////x_cytokine////IL1B////IL1A////IL6////IL1A////IL1B////TNF////IL1A////IL6////IL1B////x_cytokine	Gaucher mice			16891822	14	2006-08-01	https://pubmed.ncbi.nlm.nih.gov/?term=16891822
Genotyping for the 174G --> C promoter polymorphism of IL-6 was performed in adult patients with Gaucher disease for whom there was concurrent bone mineral density (BMD) data and in healthy Ashkenazi Jewish controls.	NA	NA	NA	IL-6	performed	Gaucher disease	abstracts	The interleukin-6 promoter polymorphism in Gaucher disease: a new modifier gene?////The interleukin-6 promoter polymorphism in Gaucher disease: a new modifier gene?	QJM : monthly journal of the Association of Physicians	IL6	Gaucher disease			12897342	4	2003-08-01	https://pubmed.ncbi.nlm.nih.gov/?term=12897342
Glucosylceramide-laden tissue macrophages in Gaucher patients secrete large quantities of chitotriosidase and CC chemokine ligand 18 (CCL18), resulting in markedly increased plasma levels.	NA	patients	macrophages;plasma	Glucosylceramide////Gaucher patients	laden////secrete	Gaucher patients////CC chemokine ligand 18////CCL18	abstracts	CCL18: a urinary marker of Gaucher cell burden in Gaucher patients.////CCL18: a urinary marker of Gaucher cell burden in Gaucher patients.	Journal of inherited metabolic disease	CCL18	Gaucher patients		Glucosylceramide	16736095	9	2006-08-01	https://pubmed.ncbi.nlm.nih.gov/?term=16736095
Glucosylsphingosine could represent a more specific and sensitive biomarker than chitotriosidase or CCL18 [19,22].	NA	NA	NA	Glucosylsphingosine	represent	CCL18	body_nonstandard	A Review of Gaucher Disease Pathophysiology, Clinical Presentation and Treatments.////A Review of Gaucher Disease Pathophysiology, Clinical Presentation and Treatments.	International journal of molecular sciences	CCL18			Glucosylsphingosine	28218669	64	2017-02-01	https://pubmed.ncbi.nlm.nih.gov/?term=28218669
Glucosylsphingosine is a novel biomarker whose sensitivity and specificity are superior to those of chitotriosidase and CCL18 [19,22].	NA	NA	NA	Glucosylsphingosine	are superior////is biomarker	CCL18	body_nonstandard	A Review of Gaucher Disease Pathophysiology, Clinical Presentation and Treatments.////A Review of Gaucher Disease Pathophysiology, Clinical Presentation and Treatments.	International journal of molecular sciences	CCL18			Glucosylsphingosine	28218669	64	2017-02-01	https://pubmed.ncbi.nlm.nih.gov/?term=28218669
Hence, plasma levels of massively secreted chitotriosidase and CCL18 (chemokine, ligand 18) are used to monitor efficacy of enzyme substitution in GD therapy (ERT) [44].	NA	NA	plasma	CCL18	monitor	GD	body_nonstandard	Defective Sphingolipids Metabolism and Tumor Associated Macrophages as the Possible Links Between Gaucher Disease and Blood Cancer Development.////Defective Sphingolipids Metabolism and Tumor Associated Macrophages as the Possible Links Between Gaucher Disease and Blood Cancer Development.	International journal of molecular sciences	CCL18	GD			30781349	2	2019-02-01	https://pubmed.ncbi.nlm.nih.gov/?term=30781349
However, Monocytes chemotactic protein-1 (MCP-1) and Interleukin-8 (IL-8) levels, that were found to be increased in CBE treated MSCs and in Campeau's study, were found similar between GD and controls (83.83 and 127.08 pg/mL/10^4 cells respectively for MCP-1, P = 0.577; 17.90 and 18.19 pg/mL/10^4 cells respectively for IL-8, P = 0.525).	NA	NA	NA	IL-8////Interleukin-8////MCP-1	found////found similar	MCP-1////GD	body_results	A prospective study of bone marrow hematopoietic and mesenchymal stem cells in type 1 Gaucher disease patients.////A prospective study of bone marrow hematopoietic and mesenchymal stem cells in type 1 Gaucher disease patients.	PloS one	CXCL8////CCL2////CXCL8////CCL2	GD			23935976	6	2013-01-01	https://pubmed.ncbi.nlm.nih.gov/?term=23935976
However, responses to interferon-beta and interferon-gamma are significantly enriched in only Gaucher re-analysis (with red circles).	NA	NA	NA	interferon-beta////interferon-gamma	enriched	Gaucher	body_results	VIO: ontology classification and study of vaccine responses given various experimental and analytical conditions.	BMC bioinformatics	IFNB1////IFNG	Gaucher			31865910	3	2019-12-01	https://pubmed.ncbi.nlm.nih.gov/?term=31865910
IFNβ production in neurons that accumulate GlcCer leads to ISG expression in neighboring microglia .	NA	NA	neurons	IFNβ	leads	GlcCer	body_results	Induction of the type I interferon response in neurological forms of Gaucher disease.////Induction of the type I interferon response in neurological forms of Gaucher disease.	Journal of neuroinflammation	IFNB1			GlcCer	27175482	10	2016-05-01	https://pubmed.ncbi.nlm.nih.gov/?term=27175482
IL-1β, IFN-γ, and TNF-α, which are also secreted by Gaucher cell MΦs lead to the induction of iNOS/NO2 expression and the release of NO.	NA	NA	gaucher cells	TNF-α	secreted	Gaucher cell	body_nonstandard	Immunological cells and functions in Gaucher disease.////Immunological cells and functions in Gaucher disease.	Critical reviews in oncogenesis	TNF	Gaucher cell			23510064	20	2013-01-01	https://pubmed.ncbi.nlm.nih.gov/?term=23510064
IL-6 and CCL-18 are also used as biomarkers of GD (33), particularly in the 6% of the human population harboring a mutation in the ChT1 gene that abrogates its expression (7, 31).	NA	NA	NA	CCL-18	used	GD	body_results	Gaucher iPSC-derived macrophages produce elevated levels of inflammatory mediators and serve as a new platform for therapeutic development.////Gaucher iPSC-derived macrophages produce elevated levels of inflammatory mediators and serve as a new platform for therapeutic development.	Stem cells (Dayton, Ohio)	CCL18	GD			24801745	22	2014-09-01	https://pubmed.ncbi.nlm.nih.gov/?term=24801745
Imiglucerase resulted in rapid decrease of glucosylsphingosine (chitotriosidase and CCL18 were comparably reduced).61	NA	NA	NA	Imiglucerase////glucosylsphingosine	resulted////reduced	glucosylsphingosine////CCL18	body_nonstandard	Imiglucerase in the management of Gaucher disease type 1: an evidence-based review of its place in therapy.////Imiglucerase in the management of Gaucher disease type 1: an evidence-based review of its place in therapy.	Core evidence	CCL18		Imiglucerase	glucosylsphingosine	27790078	5	2016-01-01	https://pubmed.ncbi.nlm.nih.gov/?term=27790078
Immunohistochemistry demonstrates that Gaucher cells are the prominent source of CCL18.	NA	NA	gaucher cells	Gaucher cells	are source	CCL18	abstracts	Marked elevation of the chemokine CCL18/PARC in Gaucher disease: a novel surrogate marker for assessing therapeutic intervention.////Marked elevation of the chemokine CCL18/PARC in Gaucher disease: a novel surrogate marker for assessing therapeutic intervention.	Blood	CCL18	Gaucher cells			12969956	78	2004-01-01	https://pubmed.ncbi.nlm.nih.gov/?term=12969956
Importantly, GBA1 silencing induced p38δ and promoted IL-6 production after phorbol ester treatment [53].	NA	NA	NA	GBA1	promoted	IL-6	body_nonstandard	Are Glucosylceramide-Related Sphingolipids Involved in the Increased Risk for Cancer in Gaucher Disease Patients? Review and Hypotheses.	Cancers	IL6		GBA1		32085512	1	2020-02-01	https://pubmed.ncbi.nlm.nih.gov/?term=32085512
Importantly, plasma GlcCer concentration and GlcCer/Cer ratio were positively correlated with severity of disease, plasma chitotriosidase and CCL18 [36].	NA	NA	plasma	GlcCer	correlated	CCL18	body_nonstandard	Defective Sphingolipids Metabolism and Tumor Associated Macrophages as the Possible Links Between Gaucher Disease and Blood Cancer Development.////Defective Sphingolipids Metabolism and Tumor Associated Macrophages as the Possible Links Between Gaucher Disease and Blood Cancer Development.	International journal of molecular sciences	CCL18			GlcCer	30781349	2	2019-02-01	https://pubmed.ncbi.nlm.nih.gov/?term=30781349
In 2013, Rolfs et al have proposed that, glucosylsphingosine is a more specific and sensitive biomarker than CT and CCL18/PARC in normal individuals, GD cases, GD carrier and other LSD patients [23].	NA	patients	NA	glucosylsphingosine	is biomarker	CCL18////PARC////GD	body_introduction	Twenty- five years of biochemical diagnosis of Gaucher disease: the Egyptian experience.	Heliyon	CCL18	GD		glucosylsphingosine	31720445	1	2019-10-01	https://pubmed.ncbi.nlm.nih.gov/?term=31720445
In addition to CXCL8/IL8, GC-engorged MΦs also secrete KC/CXCL1, IL-1β, IFN-γ, and TNF-α, which are critical for the recruitment of PMNs and release of their activation products (e.g., TNF-α, IL-6, IL-1α, IL-1β, and IL-1Ra) into the visceral organs.	NA	NA	gaucher cells	IL8////GC////CXCL8////IL-1β////CXCL1////KC////TNF-α////IFN-γ	secrete////are critical	IL-1β////CXCL1////KC////TNF-α////IFN-γ////IL-1Ra////IL-6////IL-1α	figure_captions	Immunological cells and functions in Gaucher disease.////Immunological cells and functions in Gaucher disease.	Critical reviews in oncogenesis	CXCL8////IL1B////CXCL8////CXCL1////CXCL8////TNF////CXCL8////IFNG////IL1B////CXCL1////TNF////IFNG////CXCL8////IL1RN////CXCL8////IL6////IL1B////IL1RN////IL1B////IL6////CXCL1////IL1B////CXCL1////IL1RN////CXCL1////IL6////TNF////IL1B////TNF////IL1RN////TNF////IL1A////TNF////IL6////IFNG////IL1B////IFNG////IL1RN////IFNG////IL6////IL1RN////IL6			GC	23510064	20	2013-01-01	https://pubmed.ncbi.nlm.nih.gov/?term=23510064
In addition with Th17 cytokines produced by combined activity of APCs and T cells initial Mφ and DC activation due to excess accumulation of GC trigger the release of C-X-C chemokine i.e.; keratinocyte-derived chemokine (KC) orchemokine (C-X-C motif) ligand 1 (CXCL1) and Mφ-inflammatory protein-2 (MIP 2) or chemokine (C-X-C motif) ligand 2 (CXCL2) which causes the recruitment of PMNs into Gaucher…	NA	NA	NA	Th17 cytokines////chemokine (C-X-C motif) ligand 2////MIP 2////KC////CXCL1////CXCL2	initial////causes////trigger	GC////Gaucher disease	body_supplementary_materials	Immunological cell type characterization and Th1-Th17 cytokine production in a mouse model of Gaucher disease.////Immunological cell type characterization and Th1-Th17 cytokine production in a mouse model of Gaucher disease.	Molecular genetics and metabolism	Th17 cytokine////CXCL2////CXCL1	Gaucher disease		GC	22595426	12	2012-07-01	https://pubmed.ncbi.nlm.nih.gov/?term=22595426
In addition with the IL17, increased concentration of C-X-C chemokines i.e., KC or CXCL1 and MIP 2 or CXCL2 in sera (p<0.01-p<0.001) and culture supernatant of both Mφ (p<0.01) and DC (p<0.001) implicate the contribution of these elements in the recruitment of PMNs into GCase deficient tissues (Supplementary Figs. 5F–H).	NA	patients; in vitro	serum;culture supernatant	IL17////CXCL2////CXCL1////MIP 2////KC	addition////implicate	KC////GCase	body_results	Immunological cell type characterization and Th1-Th17 cytokine production in a mouse model of Gaucher disease.////Immunological cell type characterization and Th1-Th17 cytokine production in a mouse model of Gaucher disease.	Molecular genetics and metabolism	IL17A////CXCL1////CXCL2////CXCL1////IL17A		GCase		22595426	12	2012-07-01	https://pubmed.ncbi.nlm.nih.gov/?term=22595426
In addition, several serum analytes have been described for monitoring GD including pulmonary and activationregulated chemokine (PARC/CCL18), angiotensinconverting enzyme (ACE), macrophage inflammatory proteins (MIP)-1α, MIP-1β, CD163 and etc.	NA	NA	serum	GD	including	pulmonary and activationregulated chemokine////CCL18////PARC	body_introduction	Chitotriosidase Activity and Gene Polymorphism in Iranian Patients with Gaucher Disease and Sibling Carriers.////Chitotriosidase Activity and Gene Polymorphism in Iranian Patients with Gaucher Disease and Sibling Carriers.	Iranian journal of child neurology	CCL18	GD			27843468	1	2016-01-01	https://pubmed.ncbi.nlm.nih.gov/?term=27843468
In addition, the systemic elevation of some cytokines, such as TNFα, IL-6, IL-8, and IL-10, observed in GD patients [46,48,115], which are known to promote tumor development, could be involved in the increased tumor growth we observed.	NA	patients	NA	cytokines////IL-6////IL-10////TNFα////IL-8	elevation////observed	IL-8////IL-10////GD patients	body_nonstandard	Are Glucosylceramide-Related Sphingolipids Involved in the Increased Risk for Cancer in Gaucher Disease Patients? Review and Hypotheses.	Cancers	x_cytokine////CXCL8////IL6////IL10////IL6////IL10////TNF////IL10////TNF////x_cytokine////IL10////x_cytokine////CXCL8////IL10////CXCL8	GD patients			32085512	1	2020-02-01	https://pubmed.ncbi.nlm.nih.gov/?term=32085512
In addition, we show that GD MSCs promoted increased osteoclastogenesis through RANKL and IL-1β.	NA	NA	mesenchymal stem cells	GD	promoted	RANKL////IL-1β	abstracts	Gaucher disease-associated alterations in mesenchymal stem cells reduce osteogenesis and favour adipogenesis processes with concomitant increased osteoclastogenesis.	Molecular genetics and metabolism	TNFSF11////IL1B	GD			32536424		2020-08-01	https://pubmed.ncbi.nlm.nih.gov/?term=32536424
In conclusion, CCL18 concentration is as accurate as chitotriosidase activity in assessing hematological and visceral parameters of GD severity and can be measured in all GD patients.	NA	patients	NA	CCL18	is accurate	GD	abstracts	Accuracy of chitotriosidase activity and CCL18 concentration in assessing type I Gaucher disease severity. A systematic review with meta-analysis of individual participant data.	Haematologica	CCL18	GD			32001533	2	2020-01-01	https://pubmed.ncbi.nlm.nih.gov/?term=32001533
In conclusion, MIP-1alpha and MIP-1beta are elevated in plasma of Gaucher patients and remaining high levels of MIP-1beta during therapy seem associated with ongoing skeletal disease.	NA	patients	plasma	MIP-1beta////MIP-1alpha	elevated	Gaucher patients////MIP-1beta	abstracts	Increased plasma macrophage inflammatory protein (MIP)-1alpha and MIP-1beta levels in type 1 Gaucher disease.////Increased plasma macrophage inflammatory protein (MIP)-1alpha and MIP-1beta levels in type 1 Gaucher disease.	Biochimica et biophysica acta	CCL4////CCL3////CCL3////CCL4////CCL4////CCL4	Gaucher patients			17499484	31	2007-07-01	https://pubmed.ncbi.nlm.nih.gov/?term=17499484
In conclusion, next to radiological monitoring of the bone marrow and skeleton (Maas et al. 2002, 2003; Poll et al. 2002), measurement of plasma levels of chitotriosidase and/or PARC/CCL18 offers valuable information for clinical management of type 1 Gaucher patients.	GD1	patients	plasma	PARC////CCL18	offers	type 1 Gaucher	body_nonstandard	Biomarkers in the diagnosis of lysosomal storage disorders: proteins, lipids, and inhibodies.////Biomarkers in the diagnosis of lysosomal storage disorders: proteins, lipids, and inhibodies.	Journal of inherited metabolic disease	CCL18	type 1 Gaucher			21445610	32	2011-06-01	https://pubmed.ncbi.nlm.nih.gov/?term=21445610
In conclusion, plasma chitotriosidase and CCL18 may also serve as markers for the formation of pathological lipid-laden macrophages in type B NPD, in analogy to Gaucher disease.	NA	NA	NA	CCL18	serve	Gaucher disease	abstracts	Plasma chitotriosidase and CCL18: early biochemical surrogate markers in type B Niemann-Pick disease.////Plasma chitotriosidase and CCL18: early biochemical surrogate markers in type B Niemann-Pick disease.	Journal of inherited metabolic disease	CCL18	Gaucher disease			15702402	18	2005-01-01	https://pubmed.ncbi.nlm.nih.gov/?term=15702402
In contrast to CCL18 and chitotriosidase, GlcSph is directly related to the primary molecular defect in GD1 patients.	GD1	patients	NA	GlcSph////CCL18	related////is	GD1 patients////GlcSph	body_introduction	Biochemical response to substrate reduction therapy versus enzyme replacement therapy in Gaucher disease type 1 patients.////Biochemical response to substrate reduction therapy versus enzyme replacement therapy in Gaucher disease type 1 patients.	Orphanet journal of rare diseases	CCL18	GD1 patients		GlcSph	27008851	12	2016-03-01	https://pubmed.ncbi.nlm.nih.gov/?term=27008851
In contrast to TNF alpha, IL-6, and IL-1beta, the anti-inflammatory cytokine IL-10 was secreted at lower levels in types 2-a and 2-b GD macrophages compared to controls, and LPS treatment did not alter IL-10 secretion to a significant extent (Fig. 2D).	GD2	NA	macrophages	IL-1beta////cytokine////IL-10////TNF alpha////IL-6	secreted	IL-10////GD////IL-1beta////cytokine	body_results	Gaucher iPSC-derived macrophages produce elevated levels of inflammatory mediators and serve as a new platform for therapeutic development.////Gaucher iPSC-derived macrophages produce elevated levels of inflammatory mediators and serve as a new platform for therapeutic development.	Stem cells (Dayton, Ohio)	IL1B////IL10////x_cytokine////IL10////IL1B////x_cytokine////IL10////TNF////IL1B////TNF////x_cytokine////TNF////IL10////IL6////IL1B////IL6////x_cytokine////IL6////IL10	GD			24801745	22	2014-09-01	https://pubmed.ncbi.nlm.nih.gov/?term=24801745
In fact, inflammation seems to play an important role in the pathogenesis of GD, as significant changes in the levels of many inflammatory mediators, including interleukin-1β (IL-1β), are present not only in the serum of GD patients, i.e., released by macrophages [11,12] but also in the brain of GD mice [13,14].	NA	mouse model; patients	serum; brain	GD	play	interleukin-1β////IL-1β	body_introduction	CRISPR/Cas9 Editing for Gaucher Disease Modelling.	International journal of molecular sciences	IL1B	GD			32380730		2020-05-01	https://pubmed.ncbi.nlm.nih.gov/?term=32380730
In fact, previous studies showed that GBA1 knockdown potentiates p38-dependent formation of IL-6 in human cell lines [16], and IL-6 has been shown to increase in serum of patients with Gaucher’s disease [11, 12].	NA	in vitro; patients	cell lines; serum	GBA1////IL-6	potentiates////increase	IL-6////Gaucher	body_results	Activation of p38 Mitogen-Activated Protein Kinase in Gaucher's Disease.////Activation of p38 Mitogen-Activated Protein Kinase in Gaucher's Disease.	PloS one	IL6	Gaucher	GBA1		26312487	5	2015-01-01	https://pubmed.ncbi.nlm.nih.gov/?term=26312487
In Gaucher cells, certain cytokines (IL-6 and IL-1β) also increase hepcidin gene transcription; the macrophages activated in this way can also induce iron retention via an autocrine mechanism [70] and decrease glycosylation capabilities, leading to a decrease in glycosylated ferritin [71].	NA	NA	gaucher cells	Gaucher cells	increase	cytokines////IL-6////IL-1β	body_nonstandard	A Review of Gaucher Disease Pathophysiology, Clinical Presentation and Treatments.////A Review of Gaucher Disease Pathophysiology, Clinical Presentation and Treatments.	International journal of molecular sciences	x_cytokine////IL6////IL1B	Gaucher cells			28218669	64	2017-02-01	https://pubmed.ncbi.nlm.nih.gov/?term=28218669
In Gaucher disease, for example, a chemokine, CCL18, has been identified as a biomarker for clinical development that reflects disease severity and response to treatment.	NA	NA	NA	Gaucher disease	identified	CCL18	abstracts	Biomarkers in lysosomal storage diseases: a review.////Biomarkers in lysosomal storage diseases: a review.	Acta paediatrica (Oslo, Norway : 1992). Supplement	CCL18	Gaucher disease			15895710	5	2005-03-01	https://pubmed.ncbi.nlm.nih.gov/?term=15895710
In GD patients, CCL18 plasma levels are 10–50 times higher than those of controls [11,144,145].	NA	patients	plasma	GD patients	are	CCL18	body_nonstandard	A Review of Gaucher Disease Pathophysiology, Clinical Presentation and Treatments.////A Review of Gaucher Disease Pathophysiology, Clinical Presentation and Treatments.	International journal of molecular sciences	CCL18	GD patients			28218669	64	2017-02-01	https://pubmed.ncbi.nlm.nih.gov/?term=28218669
In GD patients, chemokine (C-C motif) ligand 18 (CCL18) is known to be secreted at elevated levels by activated macrophages and has been used as biomarker to study response to ERT.	NA	NA	NA	GD patients	known	CCL18////C-C	body_results	Effect of Substrate Reduction Therapy in Comparison to Enzyme Replacement Therapy on Immune Aspects and Bone Involvement in Gaucher Disease.	Biomolecules	CCL18////CXCR1	GD patients			32244296		2020-03-01	https://pubmed.ncbi.nlm.nih.gov/?term=32244296
In non-splenectomized patients, levels of MIP-1α, MIP-1β, and TNFα differed significantly between GD1 untreated and GD1 ERT-treated patients.	NA	NA	NA	MIP-1β////TNFα////MIP-1α	differed	GD1	body_results	The influence of genetic variability and proinflammatory status on the development of bone disease in patients with Gaucher disease.////The Influence of Genetic Variability and Proinflammatory Status on the Development of Bone Disease in Patients with Gaucher Disease.	PloS one	CCL4////TNF////CCL3	GD1			25978039	7	2015-01-01	https://pubmed.ncbi.nlm.nih.gov/?term=25978039
In our analysis, age (p < 0.001), serum chitotriosidase (p < 0.001) serum CCL18 (p = 0.001), splenectomy (p=0.02) and treatment with ELI-SRT (p < 0.001) were most predictive of plasma lyso-GL 1 levels after adjusting for each other and for all other variables mentioned above.	NA	NA	NA	CCL18	were predictive	lyso-GL 1	body_results	Glucosylsphingosine is a key biomarker of Gaucher disease.////Glucosylsphingosine is a key biomarker of Gaucher disease.	American journal of hematology	CCL18			lyso-GL 1	27441734	32	2016-11-01	https://pubmed.ncbi.nlm.nih.gov/?term=27441734
In patients naive to treatment, chitotriosidase, CCL18 and glucosylsphingosine decreased comparably upon eliglustat and ERT treatment (imiglucerase or velaglucerase) while the response to miglustat was less.8	NA	patients	NA	glucosylsphingosine////CCL18	decreased	imiglucerase	body_nonstandard	Imiglucerase in the management of Gaucher disease type 1: an evidence-based review of its place in therapy.////Imiglucerase in the management of Gaucher disease type 1: an evidence-based review of its place in therapy.	Core evidence	CCL18		imiglucerase	glucosylsphingosine	27790078	5	2016-01-01	https://pubmed.ncbi.nlm.nih.gov/?term=27790078
In plasma samples from untreated patients, levels of IL-10, MIP-1α, and TNFα differed significantly with respect to GD1 genotype (Fig 5).	GD1	patients	NA	IL-10////TNFα////MIP-1α	differed	GD1	body_results	The influence of genetic variability and proinflammatory status on the development of bone disease in patients with Gaucher disease.////The Influence of Genetic Variability and Proinflammatory Status on the Development of Bone Disease in Patients with Gaucher Disease.	PloS one	IL10////TNF////CCL3	GD1			25978039	7	2015-01-01	https://pubmed.ncbi.nlm.nih.gov/?term=25978039
In sharp contrast to chitotriosidase, the levels of chemokine CCL18 both in plasma and in urine correlated perfectly with other GD values.	NA	NA	plasma; urine	CCL18	correlated	GD	body_nonstandard	Human chitinases and chitinase-like proteins as indicators for inflammation and cancer.////Human chitinases and chitinase-like proteins as indicators for inflammation and cancer.	Biomarker insights	CCL18	GD			19662198	57	2007-05-01	https://pubmed.ncbi.nlm.nih.gov/?term=19662198
In subjects UT-01 to UT-04 who had started treatment for GD, there was a decrease in CCL18 levels between visits 2 and 3 compared to visit 1 as a positive response to therapy.	NA	NA	NA	GD	was decrease	CCL18	body_results	Effect of Substrate Reduction Therapy in Comparison to Enzyme Replacement Therapy on Immune Aspects and Bone Involvement in Gaucher Disease.	Biomolecules	CCL18	GD			32244296		2020-03-01	https://pubmed.ncbi.nlm.nih.gov/?term=32244296
In this re- gard, although lyso-Gb1 has recently emerged as a promising specific biomarker of GD (Fuller et al. , 2015), the most frequent and consistently altered molecules in GD have been found to be the following: chitotriosidase (EC 3.2.1.14), angiotensin converting enzyme (EC 3.4.15.1), CCL18 (P55774), tartarate-resistant acid phosphatase (EC3.1.3.2) and serum ferritin (SF) (	NA	NA	NA	lyso-Gb1////GD	emerged////be following	GD////SF////CCL18	body_introduction	The prognostic value of the serum ferritin in a southern Brazilian cohort of patients with Gaucher disease.////The prognostic value of the serum ferritin in a southern Brazilian cohort of patients with Gaucher disease.	Genetics and molecular biology	KITLG////CCL18	GD		lyso-Gb1	27007895	2	2016-03-01	https://pubmed.ncbi.nlm.nih.gov/?term=27007895
In this study we report that GD hiPSC macrophages derived from 6 different patients are abnormally activated and produce high levels of TNF alpha, IL-1beta, IL-6, and ChT1, which are characteristically elevated in the serum of GD patients.	NA	in vitro	macrophages	IL-6////GD	elevated////produce	GD patients////TNF alpha////IL-1beta	body_introduction	Gaucher iPSC-derived macrophages produce elevated levels of inflammatory mediators and serve as a new platform for therapeutic development.////Gaucher iPSC-derived macrophages produce elevated levels of inflammatory mediators and serve as a new platform for therapeutic development.	Stem cells (Dayton, Ohio)	IL6////TNF////IL1B	GD patients////GD			24801745	22	2014-09-01	https://pubmed.ncbi.nlm.nih.gov/?term=24801745
Increased concentrations of IL-6 and TNFα were observed in both GD and insulin resistance [34].	NA	NA	NA	TNFα////IL-6	observed	GD	body_nonstandard	Endocrine and metabolic disorders in patients with Gaucher disease type 1: a review.	Orphanet journal of rare diseases	TNF////IL6	GD			31791361		2019-12-01	https://pubmed.ncbi.nlm.nih.gov/?term=31791361
Increased serum levels of cytokines such as IL-1beta, IL-1 receptor antagonist, IL-6, TNF-alpha, and soluble IL-2 receptor levels were reported in Gaucher disease type 1 patients compared to normal controls [109].	GD1	patients	serum	IL-1////IL-1beta////cytokines////IL-2////IL-6////TNF-alpha	reported	Gaucher disease type 1	body_introduction	Glycosphingolipids and neuroinflammation in Parkinson's disease.	Molecular neurodegeneration	Interleukin-1////IL1B////x_cytokine////IL2////IL6////TNF	Gaucher disease type 1			33069254		2020-10-01	https://pubmed.ncbi.nlm.nih.gov/?term=33069254
Indeed, some Gaucher disease patients had increased levels of pro-inflammatory (i.e., TNFα, IL-6, IL-8, and IL-1β) and anti-inflammatory cytokines (i.e., CD14) in serum and/or tissues [2-4].	NA	patients	serum; tissues	Gaucher disease////IL-6////TNFα	increased////had	cytokines////IL-8////IL-6////TNFα////IL-1β	body_introduction	Global gene expression profile progression in Gaucher disease mouse models.////Global gene expression profile progression in Gaucher disease mouse models.	BMC genomics	x_cytokine////CXCL8////IL6////TNF////IL1B////IL6////CXCL8////TNF////CXCL8	Gaucher disease			21223590	15	2011-01-01	https://pubmed.ncbi.nlm.nih.gov/?term=21223590
Initially, to examine the responsiveness of type II GD cells to EPO, the expression of the EPO receptor was determined at mRNA and protein levels.	NA	in vitro	NA	type II GD	expression	EPO	abstracts	Protective effect of recombinant human erythropoietin in type II Gaucher disease patient cells by scavenging endoplasmic reticulum stress.////Protective effect of recombinant human erythropoietin in type II Gaucher disease patient cells by scavenging endoplasmic reticulum stress.	Biomedicine & pharmacotherapy = Biomedecine & pharmacotherapie	EPO	type II GD			21775095		2011-08-01	https://pubmed.ncbi.nlm.nih.gov/?term=21775095
Interestingly, IL-6 has also been reported to be elevated in GD patients with clonal immunoglobulin abnormalities [45,46].	NA	patients	NA	IL-6	elevated	GD patients	body_nonstandard	Are Glucosylceramide-Related Sphingolipids Involved in the Increased Risk for Cancer in Gaucher Disease Patients? Review and Hypotheses.	Cancers	IL6	GD patients			32085512	1	2020-02-01	https://pubmed.ncbi.nlm.nih.gov/?term=32085512
Interferon-γ-induced STAT1 phosphorylation was also significantly inhibited in Gaucher cells.	NA	NA	gaucher cells	Interferon-γ	inhibited	Gaucher cells	abstracts	Alterations in the properties of the cell membrane due to glycosphingolipid accumulation in a model of Gaucher disease.////Alterations in the properties of the cell membrane due to glycosphingolipid accumulation in a model of Gaucher disease.	Scientific reports	IFNG	Gaucher cells			29317695	10	2018-01-01	https://pubmed.ncbi.nlm.nih.gov/?term=29317695
It is concluded that assessment of urinary CCL18 of Gaucher patients gives insight into the total body burden on Gaucher cells, whereas that of chitotriosidase does not.	NA	patients	urine	CCL18////Gaucher patients	gives	Gaucher cells	abstracts	CCL18: a urinary marker of Gaucher cell burden in Gaucher patients.////CCL18: a urinary marker of Gaucher cell burden in Gaucher patients.	Journal of inherited metabolic disease	CCL18	Gaucher cells////Gaucher patients////Gaucher cells			16736095	9	2006-08-01	https://pubmed.ncbi.nlm.nih.gov/?term=16736095
It is possible that CCL18/PARC has a higher sensitivity than chitotriosidase in monitoring of ERT dosing in GD3.	GD3	NA	NA	PARC////CCL18	has	GD3	abstracts	Impact of imiglucerase supply shortage on clinical and laboratory parameters in Norrbottnian patients with Gaucher disease type 3.////Impact of Imiglucerase Supply Shortage on Clinical and Laboratory Parameters in Norrbottnian Patients with Gaucher Disease Type 3.	Archivum immunologiae et therapiae experimentalis	CCL18	GD3			25205209	6	2015-02-01	https://pubmed.ncbi.nlm.nih.gov/?term=25205209
It was subsequently discovered that chemokine (C-C motif) ligand 18 (CCL18), also called pulmonary and activation- regulated chemokine (PARC) is also massively produced and secreted by Gaucher cells, resulting in twenty to forty-fold elevated plasma levels [84,85,86].	NA	NA	gaucher cells; plasma	C-C////CCL18	called chemokine////called////secreted	PARC////Gaucher cells	body_nonstandard	Glycoprotein Non-Metastatic Protein B: An Emerging Biomarker for Lysosomal Dysfunction in Macrophages.////Glycoprotein Non-Metastatic Protein B: An Emerging Biomarker for Lysosomal Dysfunction in Macrophages.	International journal of molecular sciences	CXCR1////CCL18////CCL18////CCL18////CCL18////CXCR1	Gaucher cells			30586924	6	2018-12-01	https://pubmed.ncbi.nlm.nih.gov/?term=30586924
Levels of IL-1ra, MCP-1, Mmp2, and Mmp3 were increased in Gba^−/− NSCs compared with those in Gba^+/− NSCs.	NA	NA	neural stem cells	IL-1ra////MCP-1	increased////compared	Gba	body_results	Defective Self-Renewal and Differentiation of GBA-Deficient Neural Stem Cells Can Be Restored By Macrophage Colony-Stimulating Factor.////Defective Self-Renewal and Differentiation of GBA-Deficient Neural Stem Cells Can Be Restored By Macrophage Colony-Stimulating Factor.	Molecules and cells	IL1RN////CCL2		Gba		26282862	1	2015-09-01	https://pubmed.ncbi.nlm.nih.gov/?term=26282862
Levels of pro- as well as anti-inflammatory cytokines, growth factors, and chemokines, especially those involved in inflammation and B-cell function, are disturbed in GD I, with the most impressive and consisting elevations for interleukin-10 and pulmonary and activation-regulated chemokine.	GD1	NA	NA	cytokines////GD I	disturbed	GD I////interleukin-10////pulmonary and activation-regulated chemokine	abstracts	Immunoglobulin and free light chain abnormalities in Gaucher disease type I: data from an adult cohort of 63 patients and review of the literature.////Immunoglobulin and free light chain abnormalities in Gaucher disease type I: data from an adult cohort of 63 patients and review of the literature.	Annals of hematology	x_cytokine////x_cytokine////IL10////x_cytokine////CCL18////IL10////CCL18	GD I			18274746	26	2008-06-01	https://pubmed.ncbi.nlm.nih.gov/?term=18274746
Levels of TNF-alpha and genotyping for the -308 G-->A polymorphism in the promoter of the TNF-alpha gene were performed in 17 patients with type I Gaucher disease.	GD1	patients	NA	TNF-alpha	performed	type I Gaucher disease	abstracts	TNF-alpha levels and TNF-alpha gene polymorphism in type I Gaucher disease.////TNF-alpha levels and TNF-alpha gene polymorphism in type I Gaucher disease.	Cytokine	TNF	type I Gaucher disease			15919211	5	2005-07-01	https://pubmed.ncbi.nlm.nih.gov/?term=15919211
Limitations in quantitation of the biomarker CCL18 in Gaucher disease blood samples by surface-enhanced laser desorption/ionization time-of-flight mass spectrometry.	NA	NA	blood	CCL18	biomarker////quantitation	Gaucher disease	titles	Limitations in quantitation of the biomarker CCL18 in Gaucher disease blood samples by surface-enhanced laser desorption/ionization time-of-flight mass spectrometry.////Limitations in quantitation of the biomarker CCL18 in Gaucher disease blood samples by surface-enhanced laser desorption/ionization time-of-flight mass spectrometry.	Biochimica et biophysica acta	CCL18	Gaucher disease			17010683	4	2006-10-01	https://pubmed.ncbi.nlm.nih.gov/?term=17010683
Lyso- GL1 correlation with CCL 18 (r = 0.62 P < 0.001 n = 252)	NA	NA	NA	GL1	correlation	CCL 18	figure_captions	Glucosylsphingosine is a key biomarker of Gaucher disease.////Glucosylsphingosine is a key biomarker of Gaucher disease.	American journal of hematology	CCL18			GL1	27441734	32	2016-11-01	https://pubmed.ncbi.nlm.nih.gov/?term=27441734
Lyso-GL1 correlated with chitotriosidase (r = 0.59 P < 0.001), CCL18 (r = 0.62 P <0.001), hepatomegaly (r = 0.28 P < 0.001), splenomegaly (r = 0.27 P = 0.003), splenectomy (P = 0.01) and treatment mode (P < 0.001).	NA	NA	NA	Lyso-GL1	correlated	CCL18	abstracts	Glucosylsphingosine is a key biomarker of Gaucher disease.////Glucosylsphingosine is a key biomarker of Gaucher disease.	American journal of hematology	CCL18			Lyso-GL1	27441734	32	2016-11-01	https://pubmed.ncbi.nlm.nih.gov/?term=27441734
M-CSF at concentrations of 10 and 50 ng/ml increased the number of Gba^−/− NSs ( n = 3 per group).	NA	NA	NA	M-CSF	increased	Gba	figure_captions	Defective Self-Renewal and Differentiation of GBA-Deficient Neural Stem Cells Can Be Restored By Macrophage Colony-Stimulating Factor.////Defective Self-Renewal and Differentiation of GBA-Deficient Neural Stem Cells Can Be Restored By Macrophage Colony-Stimulating Factor.	Molecules and cells	CSF1		Gba		26282862	1	2015-09-01	https://pubmed.ncbi.nlm.nih.gov/?term=26282862
M-CSF enhances the self-renewal, proliferation, and neuronal differentiation of Gba^−/− NSCs .To examine the neurogenic potential of M-CSF, we evaluated the effects of recombinant murine M-CSF on the self-renewal of NSs at different concentrations.	NA	NA	neural stem cells	M-CSF	enhances	Gba	body_results	Defective Self-Renewal and Differentiation of GBA-Deficient Neural Stem Cells Can Be Restored By Macrophage Colony-Stimulating Factor.////Defective Self-Renewal and Differentiation of GBA-Deficient Neural Stem Cells Can Be Restored By Macrophage Colony-Stimulating Factor.	Molecules and cells	CSF1		Gba		26282862	1	2015-09-01	https://pubmed.ncbi.nlm.nih.gov/?term=26282862
M-CSF expression was reduced to a greater extent in NSCs of Gba^−/− mice compared with that in Gba^+/− NSCs.	NA	mouse model	neural stem cells	M-CSF	reduced////compared	Gba	figure_captions	Defective Self-Renewal and Differentiation of GBA-Deficient Neural Stem Cells Can Be Restored By Macrophage Colony-Stimulating Factor.////Defective Self-Renewal and Differentiation of GBA-Deficient Neural Stem Cells Can Be Restored By Macrophage Colony-Stimulating Factor.	Molecules and cells	CSF1		Gba		26282862	1	2015-09-01	https://pubmed.ncbi.nlm.nih.gov/?term=26282862
M-CSF increased BrdU incorporation in Gba^−/− cultures relative to that in untreated Gba^−/− cultures (Fig. 5B).	NA	in vitro	NA	M-CSF	increased	Gba	body_results	Defective Self-Renewal and Differentiation of GBA-Deficient Neural Stem Cells Can Be Restored By Macrophage Colony-Stimulating Factor.////Defective Self-Renewal and Differentiation of GBA-Deficient Neural Stem Cells Can Be Restored By Macrophage Colony-Stimulating Factor.	Molecules and cells	CSF1		Gba		26282862	1	2015-09-01	https://pubmed.ncbi.nlm.nih.gov/?term=26282862
M-CSF increased the number of NSs in Gba^−/− cultures at 10 and 50 ng/ml (Fig. 5A).	NA	in vitro	NA	M-CSF	increased	Gba	body_results	Defective Self-Renewal and Differentiation of GBA-Deficient Neural Stem Cells Can Be Restored By Macrophage Colony-Stimulating Factor.////Defective Self-Renewal and Differentiation of GBA-Deficient Neural Stem Cells Can Be Restored By Macrophage Colony-Stimulating Factor.	Molecules and cells	CSF1		Gba		26282862	1	2015-09-01	https://pubmed.ncbi.nlm.nih.gov/?term=26282862
M-CSF treatment of Gba^−/− NSCs resulted in increased efficiency of neuronal differentiation, along with an increase in the number of processes and enhanced neuronal outgrowth (Fig. 5C).	NA	NA	neural stem cells	M-CSF	treatment	Gba	body_results	Defective Self-Renewal and Differentiation of GBA-Deficient Neural Stem Cells Can Be Restored By Macrophage Colony-Stimulating Factor.////Defective Self-Renewal and Differentiation of GBA-Deficient Neural Stem Cells Can Be Restored By Macrophage Colony-Stimulating Factor.	Molecules and cells	CSF1		Gba		26282862	1	2015-09-01	https://pubmed.ncbi.nlm.nih.gov/?term=26282862
Macrophage inflammatory protein-1 beta (MIP-1β) has been shown to be a marker for bone disease in GD [20].	NA	NA	NA	MIP-1β	be marker	GD	body_results	Effect of Substrate Reduction Therapy in Comparison to Enzyme Replacement Therapy on Immune Aspects and Bone Involvement in Gaucher Disease.	Biomolecules	CCL4	GD			32244296		2020-03-01	https://pubmed.ncbi.nlm.nih.gov/?term=32244296
macrophages from patients with types 1 and 3 GD also secreted higher levels of TNF alpha, IL-6, and IL-1beta than control macrophages (Fig. S3A, S3B, S3C).	GD1; GD3	NA	NA	GD	secreted	TNF alpha	body_results	Gaucher iPSC-derived macrophages produce elevated levels of inflammatory mediators and serve as a new platform for therapeutic development.////Gaucher iPSC-derived macrophages produce elevated levels of inflammatory mediators and serve as a new platform for therapeutic development.	Stem cells (Dayton, Ohio)	TNF	GD			24801745	22	2014-09-01	https://pubmed.ncbi.nlm.nih.gov/?term=24801745
Marked elevation of the chemokine CCL18/PARC in Gaucher disease: a novel surrogate marker for assessing therapeutic intervention.	NA	NA	NA	CCL18////PARC	elevation	Gaucher disease	titles	Marked elevation of the chemokine CCL18/PARC in Gaucher disease: a novel surrogate marker for assessing therapeutic intervention.////Marked elevation of the chemokine CCL18/PARC in Gaucher disease: a novel surrogate marker for assessing therapeutic intervention.	Blood	CCL18	Gaucher disease			12969956	78	2004-01-01	https://pubmed.ncbi.nlm.nih.gov/?term=12969956
Measurement of plasma PARC/CCL18 has been found to yield an excellent additional tool to monitor changes in body burden of Gaucher cells.	NA	NA	NA	CCL18	monitor	Gaucher cells	body_nonstandard	Biomarkers in the diagnosis of lysosomal storage disorders: proteins, lipids, and inhibodies.////Biomarkers in the diagnosis of lysosomal storage disorders: proteins, lipids, and inhibodies.	Journal of inherited metabolic disease	CCL18	Gaucher cells			21445610	32	2011-06-01	https://pubmed.ncbi.nlm.nih.gov/?term=21445610
MIP-1beta in Gaucher patients stems from the phagocytes surrounding the Gaucher cells.	NA	NA	NA	MIP-1beta	stems	Gaucher patients	abstracts	Different dose-dependent correction of MIP-1beta and chitotriosidase during initial enzyme replacement therapy.////Different dose-dependent correction of MIP-1beta and chitotriosidase during initial enzyme replacement therapy.	Journal of inherited metabolic disease	CCL4	Gaucher patients			19255873	2	2009-04-01	https://pubmed.ncbi.nlm.nih.gov/?term=19255873
MIP-1α and MIP-1β Van Breemen and co-workers reported markedly elevated levels of the chemokines macrophage inflammatory protein (MIP)-1α and MIP-1β in plasma of symptomatic Gaucher patients (van Breemen et al. 2007).	NA	patients	plasma	MIP-1α////MIP-1β	macrophage////reported	Gaucher patients////MIP-1β	body_nonstandard	Biomarkers in the diagnosis of lysosomal storage disorders: proteins, lipids, and inhibodies.////Biomarkers in the diagnosis of lysosomal storage disorders: proteins, lipids, and inhibodies.	Journal of inherited metabolic disease	CCL3////CCL3////CCL4////CCL4	Gaucher patients			21445610	32	2011-06-01	https://pubmed.ncbi.nlm.nih.gov/?term=21445610
MIP-1α and MIP-1β, which have been shown to increase bone resorption by osteoclasts in multiple myeloma [8], were also elevated in GD with bone disease [9, 10]; therefore, in combination with other cytokines, MIP-1α and MIP-1β might also contribute to pathological skeletal alterations in GD1.	NA	NA	NA	MIP-1α////cytokines////MIP-1β	contribute////elevated	GD1////MIP-1α////MIP-1β////GD	body_introduction	The influence of genetic variability and proinflammatory status on the development of bone disease in patients with Gaucher disease.////The Influence of Genetic Variability and Proinflammatory Status on the Development of Bone Disease in Patients with Gaucher Disease.	PloS one	CCL3////x_cytokine////x_cytokine////CCL3////x_cytokine////CCL4////CCL4	GD1////////GD			25978039	7	2015-01-01	https://pubmed.ncbi.nlm.nih.gov/?term=25978039
Moreover it is known that in Gaucher disease there are signs of cytokine-mediated systemic inflammation and an imbalance between osteoclast/osteoblast activities: notably increased plasma levels of interleukin-6 have been documented in GD patients [6].	NA	NA	NA	Gaucher disease////interleukin-6////cytokine	are signs////documented	cytokine////GD patients////interleukin-6	body_discussion	Coxarthritis as the presenting symptom of Gaucher disease type 1.////Coxarthritis as the presenting symptom of Gaucher disease type 1.	Arthritis	x_cytokine////////IL6////x_cytokine////IL6	Gaucher disease////Gaucher disease////GD patients////GD patients			22046515	2	2011-01-01	https://pubmed.ncbi.nlm.nih.gov/?term=22046515
Moreover, administration of the pharmacological chaperone isofagomine to neuronopathic GD mice, which can stimulate mutant GCase function, inhibited p38 activation and TNFα production in brain tissues, and extended animal life span [50].	NA	mouse model	NA	GD mice////GCase	stimulate////inhibited////function	GCase////TNFα	body_nonstandard	Are Glucosylceramide-Related Sphingolipids Involved in the Increased Risk for Cancer in Gaucher Disease Patients? Review and Hypotheses.	Cancers	TNF	GD mice	GCase		32085512	1	2020-02-01	https://pubmed.ncbi.nlm.nih.gov/?term=32085512
Moreover, an alternative Gaucher-cell marker, CCL18, has been very recently identified and can also be employed to monitor the disease, particularly in those patients lacking chitotriosidase due to a genetic mutation.	NA	NA	NA	Gaucher-cell	identified	CCL18	abstracts	Identification and use of biomarkers in Gaucher disease and other lysosomal storage diseases.////Identification and use of biomarkers in Gaucher disease and other lysosomal storage diseases.	Acta paediatrica (Oslo, Norway : 1992). Supplement	CCL18	Gaucher-cell			15895711	15	2005-03-01	https://pubmed.ncbi.nlm.nih.gov/?term=15895711
Moreover, cytokines such as IL6 that stimulate B cells are consistently elevated in GD plasma of GD1 patients as well as of mouse model of GD.^32,42	GD1	mouse model; patients	plasma	cytokines////IL6	elevated	GD1 patients////GD	body_nonstandard	Gaucher disease and malignancy: a model for cancer pathogenesis in an inborn error of metabolism.////Gaucher disease and malignancy: a model for cancer pathogenesis in an inborn error of metabolism.	Critical reviews in oncogenesis	x_cytokine////IL6	GD1 patients////GD			23510066	27	2013-01-01	https://pubmed.ncbi.nlm.nih.gov/?term=23510066
Moreover, proinflammatory cytokines secreted by macrophages, such as interleukin-1β, interleukin-6, and tumor necrosis factor-α (TNFα), and chemokines like CCL18 are elevated in GD plasma.11 Modified macrophages also change their surface molecules, dysregulating the immune system, in fact, it is common in patients with GD to detect a monoclonal gammopathy, and there is also an increased risk of h…	NA	NA	plasma	interleukin-6////interleukin-1β////CCL18////tumor necrosis factor-α////TNFα////cytokines	elevated	GD	body_introduction	Profile of eliglustat tartrate in the management of Gaucher disease.////Profile of eliglustat tartrate in the management of Gaucher disease.	Therapeutics and clinical risk management	IL6////IL1B////CCL18////TNF////x_cytokine	GD			26811686	4	2016-01-01	https://pubmed.ncbi.nlm.nih.gov/?term=26811686
MΦ activation due to excess of glucosylceramide (GC) could trigger the release of C-C chemokines, e.g., monocyte chemoat-tractant protein-1(MCP1) or CC chemokine ligand-2 (CCL2),which cause the recruitment of blood MOs into the different visceral organs.	NA	NA	NA	glucosylceramide////GC	trigger	CCL2////C-C////MCP1	figure_captions	Immunological cells and functions in Gaucher disease.////Immunological cells and functions in Gaucher disease.	Critical reviews in oncogenesis	CCL2////CXCR1			glucosylceramide////GC	23510064	20	2013-01-01	https://pubmed.ncbi.nlm.nih.gov/?term=23510064
No correlation between urinary lyso-Gb1 and either chitotriosidase or CCL18 was observed in one study [44].	NA	NA	NA	lyso-Gb1	correlation	CCL18	body_results	Value of Glucosylsphingosine (Lyso-Gb1) as a Biomarker in Gaucher Disease: A Systematic Literature Review.	International journal of molecular sciences	CCL18			lyso-Gb1	32998334		2020-09-01	https://pubmed.ncbi.nlm.nih.gov/?term=32998334
No correlation was found between TNF-alpha genotypes and chitotriosidase levels, a putative biochemical marker for Gaucher disease severity.	NA	NA	NA	TNF-alpha	marker	Gaucher disease	abstracts	TNF-alpha levels and TNF-alpha gene polymorphism in type I Gaucher disease.////TNF-alpha levels and TNF-alpha gene polymorphism in type I Gaucher disease.	Cytokine	TNF	Gaucher disease			15919211	5	2005-07-01	https://pubmed.ncbi.nlm.nih.gov/?term=15919211
Non-specific biomarkers such as tartrate-resistant acid phosphatase, angiotensin-converting enzyme, hexosaminidase, and cathepsin K have been used for routine monitoring; however, these biomarkers are also observed in healthy individuals.35–37 Increases in interleukin (IL)-1β, IL-6, IL-10, tumor necrosis factor alpha, macrophage inflammatory protein (MIP)-1α, MIP-1β, and soluble CD 163 have also …	NA	NA	NA	MIP-1β////tumor necrosis factor alpha////IL-10////interleukin (IL)-1β	used	GD	body_nonstandard	Eliglustat tartrate for the treatment of adults with type 1 Gaucher disease.////Eliglustat tartrate for the treatment of adults with type 1 Gaucher disease.	Drug design, development and therapy	CCL4////TNF////IL10////IL1B	GD			26345314	9	2015-01-01	https://pubmed.ncbi.nlm.nih.gov/?term=26345314
Not surprisingly, Gaucher cell derived circulating proteins can aid in disease determination and therapy monitoring, exemplified for instance by chitotriosidase (FDA approved disease marker), the chemokine (C-C motif) ligand 18 (CCL-18) and glycoprotein nonmetastatic melanoma protein B (GPNMB)	NA	NA	gaucher cells	Gaucher cell	aid	CCL-18////C-C	body_nonstandard	Lyso-glycosphingolipids: presence and consequences.	Essays in biochemistry	CCL18////CXCR1	Gaucher cell			32808655		2020-09-01	https://pubmed.ncbi.nlm.nih.gov/?term=32808655
Of note, GlcCer has been reported as a specific ligand for macrophage-inducible C-type lectin (Mincle) of antigen-presenting cells, leading to the production of TNFα and MIP-2, as well as the up-regulation of costimulatory molecules presentation [60].	NA	NA	NA	GlcCer////TNFα	reported////leading	MIP-2////TNFα	body_nonstandard	Are Glucosylceramide-Related Sphingolipids Involved in the Increased Risk for Cancer in Gaucher Disease Patients? Review and Hypotheses.	Cancers	CXCL2////TNF////TNF////CXCL2			GlcCer	32085512	1	2020-02-01	https://pubmed.ncbi.nlm.nih.gov/?term=32085512
Ongoing studies are being conducted to detect useful protein biomarkers for GD through a survey of the protein composition of body fluids, cells, and tissue specimens from symptomatic Gaucher patients. Non-specific biomarkers such as tartrate-resistant acid phosphatase, angiotensin-converting enzyme, hexosaminidase, and cathepsin K have been used for routine monitoring; however, these biomarkers …	NA	NA	NA	MIP-1β	used	GD	body_nonstandard	Eliglustat tartrate for the treatment of adults with type 1 Gaucher disease.////Eliglustat tartrate for the treatment of adults with type 1 Gaucher disease.	Drug design, development and therapy	CCL4	GD			26345314	9	2015-01-01	https://pubmed.ncbi.nlm.nih.gov/?term=26345314
Only GD patients displayed GluSph levels above 5.4 ng/mL at diagnosis and this was significantly correlated with the classical biomarkers chitotriosidase (r = 0.560) and the chemokine CCL18/PARC (CCL18/PARC) (ρ = 0.515), as well as with the Spanish magnetic resonance imaging index (S-MRI, r = 0.364), whereas chitotriosidase correlated with liver volume (r = 0.372) and CCL18/PARC increased in pati…	NA	NA	NA	GD patients	correlated	CCL18////PARC	abstracts	LC-MS/MS analysis of plasma glucosylsphingosine as a biomarker for diagnosis and follow-up monitoring in Gaucher disease in the Spanish population.	Clinical chemistry and laboratory medicine	CCL18	GD patients			32126008	1	2020-04-01	https://pubmed.ncbi.nlm.nih.gov/?term=32126008
Other interesting factors, known to be highly elevated in GD patients, are pulmonary and activation-regulated chemokine (PARC) [35], which is involved in initiating the adaptive immune response.	NA	NA	NA	GD patients	are pulmonary and activation-regulated chemokine	pulmonary and activation-regulated chemokine////PARC	body_introduction	Immunoglobulin and free light chain abnormalities in Gaucher disease type I: data from an adult cohort of 63 patients and review of the literature.////Immunoglobulin and free light chain abnormalities in Gaucher disease type I: data from an adult cohort of 63 patients and review of the literature.	Annals of hematology	CCL18	GD patients			18274746	26	2008-06-01	https://pubmed.ncbi.nlm.nih.gov/?term=18274746
Our findings suggest that soluble M-CSF derived from BM-MSCs can modulate GBA-deficient NSCs, resulting in their improved proliferation and neuronal differentiation.	NA	NA	NA	M-CSF	modulate	GBA	abstracts	Defective Self-Renewal and Differentiation of GBA-Deficient Neural Stem Cells Can Be Restored By Macrophage Colony-Stimulating Factor.////Defective Self-Renewal and Differentiation of GBA-Deficient Neural Stem Cells Can Be Restored By Macrophage Colony-Stimulating Factor.	Molecules and cells	CSF1		GBA		26282862	1	2015-09-01	https://pubmed.ncbi.nlm.nih.gov/?term=26282862
Our observations suggest that macrophage colony-stimulating factor (M-CSF) plays a key role as a paracrine factor for the neurogenic effects of BM-MSCs in GBA-deficient NSCs.	NA	NA	NA	M-CSF////macrophage colony-stimulating factor	plays	GBA	body_introduction	Defective Self-Renewal and Differentiation of GBA-Deficient Neural Stem Cells Can Be Restored By Macrophage Colony-Stimulating Factor.////Defective Self-Renewal and Differentiation of GBA-Deficient Neural Stem Cells Can Be Restored By Macrophage Colony-Stimulating Factor.	Molecules and cells	CSF1		GBA		26282862	1	2015-09-01	https://pubmed.ncbi.nlm.nih.gov/?term=26282862
PARC levels were elevated in all GD patients, without a difference between patients with or without a monoclonal gammopathy (1,400.0 pg/ml (348.9–2817.3) and 1,078 pg/ml (411.4–3,552.0), respectively).	NA	patients	NA	PARC	elevated	GD patients	body_results	Immunoglobulin and free light chain abnormalities in Gaucher disease type I: data from an adult cohort of 63 patients and review of the literature.////Immunoglobulin and free light chain abnormalities in Gaucher disease type I: data from an adult cohort of 63 patients and review of the literature.	Annals of hematology	CCL18	GD patients			18274746	26	2008-06-01	https://pubmed.ncbi.nlm.nih.gov/?term=18274746
PARC/CCL18 offers valuable information for clinical management of type 1 Gaucher patients.	GD1	patients	NA	CCL18////PARC	offers	type 1 Gaucher	body_nonstandard	Biomarkers in the diagnosis of lysosomal storage disorders: proteins, lipids, and inhibodies.////Biomarkers in the diagnosis of lysosomal storage disorders: proteins, lipids, and inhibodies.	Journal of inherited metabolic disease	CCL18	type 1 Gaucher			21445610	32	2011-06-01	https://pubmed.ncbi.nlm.nih.gov/?term=21445610
Patients with GD had elevated chitotriosidase, serum TRACP-5b, and CCL-3 levels (P < 0.001).	NA	patients	NA	GD	elevated	CCL-3	abstracts	Evaluation of bone involvement in patients with Gaucher disease: a semi-quantitative magnetic resonance imaging method (using ROI estimation of bone lesion) as an alternative method to semi-quantitative methods used so far.////Evaluation of bone involvement in patients with Gaucher disease: a semi-quantitative magnetic resonance imaging method (using ROI estimation of bone lesion) as an alternati…	European journal of haematology	CCL3	GD			25645321	3	2015-10-01	https://pubmed.ncbi.nlm.nih.gov/?term=25645321
Plasma CCL18 level is elevated 10- to 50-fold above normal values in patients with active GD.	NA	patients	plasma	CCL18	elevated	GD	body_introduction	Plasma chitotriosidase activity versus CCL18 level for assessing type I Gaucher disease severity: protocol for a systematic review with meta-analysis of individual participant data.////Plasma chitotriosidase activity versus CCL18 level for assessing type I Gaucher disease severity: protocol for a systematic review with meta-analysis of individual participant data.	Systematic reviews	CCL18	GD			28427477	4	2017-04-01	https://pubmed.ncbi.nlm.nih.gov/?term=28427477
Plasma CCL18 levels can serve as alternative surrogate marker for storage cells in patients with Gaucher disease and monitoring of plasma CCL18 levels proves to be useful in determination of therapeutic efficacy, especially in patients who are deficient in chitotriosidase activity.	NA	patients	plasma	CCL18	serve	Gaucher disease	abstracts	Marked elevation of the chemokine CCL18/PARC in Gaucher disease: a novel surrogate marker for assessing therapeutic intervention.////Marked elevation of the chemokine CCL18/PARC in Gaucher disease: a novel surrogate marker for assessing therapeutic intervention.	Blood	CCL18	Gaucher disease			12969956	78	2004-01-01	https://pubmed.ncbi.nlm.nih.gov/?term=12969956
Plasma CCL18 originates from Gaucher cells disseminated in various body locations and reflects the overall body burden of Gaucher cells [17].	NA	NA	plasma	CCL18	reflects	Gaucher cells	body_introduction	Plasma chitotriosidase activity versus CCL18 level for assessing type I Gaucher disease severity: protocol for a systematic review with meta-analysis of individual participant data.////Plasma chitotriosidase activity versus CCL18 level for assessing type I Gaucher disease severity: protocol for a systematic review with meta-analysis of individual participant data.	Systematic reviews	CCL18	Gaucher cells			28427477	4	2017-04-01	https://pubmed.ncbi.nlm.nih.gov/?term=28427477
Plasma CCL18/PARC, a member of the CC chemokine family, has been found to be several ten-fold increased in symptomatic Gaucher type I patients.	GD1	patients	plasma	PARC////CCL18	increased	Gaucher type I	abstracts	Elevated plasma chemokine CCL18/PARC in beta-thalassemia.////Elevated plasma chemokine CCL18/PARC in beta-thalassemia.	Blood cells, molecules & diseases	CCL18	Gaucher type I			16137900	2	2005-08-31	https://pubmed.ncbi.nlm.nih.gov/?term=16137900
Plasma chitotriosidase activity and CC chemokine ligand 18 (CCL18) have been exchangeably used for monitoring GD activity and response to enzyme replacement therapy in conjunction with clinical assessment.	NA	NA	plasma	CC chemokine ligand 18////CCL18	used	GD	abstracts	Plasma chitotriosidase activity versus CCL18 level for assessing type I Gaucher disease severity: protocol for a systematic review with meta-analysis of individual participant data.////Plasma chitotriosidase activity versus CCL18 level for assessing type I Gaucher disease severity: protocol for a systematic review with meta-analysis of individual participant data.	Systematic reviews	CCL18	GD			28427477	4	2017-04-01	https://pubmed.ncbi.nlm.nih.gov/?term=28427477
Plasma GlcSph levels correlate well with those of established protein biomarkers of Gaucher cells such as chitotriosidase and CCL18, suggesting that GlcSph is predominantly macrophage derived [48].	NA	NA	plasma	GlcSph	correlate	Gaucher cells////CCL18	body_nonstandard	Lyso-glycosphingolipids: presence and consequences.	Essays in biochemistry	CCL18	Gaucher cells		GlcSph	32808655		2020-09-01	https://pubmed.ncbi.nlm.nih.gov/?term=32808655
Plasma gpNMB was also elevated, correlating with chitotriosidase and CCL18, which are established markers for human Gaucher cells.	NA	NA	plasma	CCL18	established	Gaucher cells	abstracts	Elevation of glycoprotein nonmetastatic melanoma protein B in type 1 Gaucher disease patients and mouse models.////Elevation of glycoprotein nonmetastatic melanoma protein B in type 1 Gaucher disease patients and mouse models.	FEBS open bio	CCL18	Gaucher cells			27642553	17	2016-09-01	https://pubmed.ncbi.nlm.nih.gov/?term=27642553
Plasma levels of several pro-inflammatory cytokines, such as tumor necrosis factor (TNF)-α, interleukin (IL)-1, and IL-6, as well as the anti-inflammatory IL-10, were found to be increased in GD to variable extents [4, 30–33]. IL-6 and IL-10, as well as hepatocyte growth factor (HGF), are also involved in the pathogenesis of MM [34].	NA	NA	plasma	tumor necrosis factor////IL-10////TNF////cytokines////IL-6////interleukin (IL)-1	found////increased	hepatocyte growth factor////IL-10////HGF////IL-6////GD	body_introduction	Immunoglobulin and free light chain abnormalities in Gaucher disease type I: data from an adult cohort of 63 patients and review of the literature.////Immunoglobulin and free light chain abnormalities in Gaucher disease type I: data from an adult cohort of 63 patients and review of the literature.	Annals of hematology	Tumor Necrosis Factors////HGF////IL10////MET////IL6////TNF////x_cytokine////Interleukin-1	GD			18274746	26	2008-06-01	https://pubmed.ncbi.nlm.nih.gov/?term=18274746
Plasma lyso-GL1 levels correlated with other indicators of disease severity, chitotriosidase (r=0.59 p<0.001), CCL18 (r= 0.62 p <0.001), liver volume (r=0.28 p< 0.001) and spleen volume (r=0.27 p=0.003), age (r = −0.22 p<0.001), splenectomy (i.e., it was higher in asplenic patients than in patients with intact spleen, p = 0.01) and treatment with ELI-SRT (p < 0.001).	NA	NA	plasma	lyso-GL1	correlated	CCL18	body_introduction	Glucosylsphingosine is a key biomarker of Gaucher disease.////Glucosylsphingosine is a key biomarker of Gaucher disease.	American journal of hematology	CCL18			lyso-GL1	27441734	32	2016-11-01	https://pubmed.ncbi.nlm.nih.gov/?term=27441734
Plasma protein markers reflecting disease burden (chitotriosidase, CCL18) and lipids reflecting substrate accumulation (glucosylsphingosine, glucosylceramide) were determined.	NA	NA	plasma	CCL18	reflecting	glucosylceramide////glucosylsphingosine	abstracts	Biochemical response to substrate reduction therapy versus enzyme replacement therapy in Gaucher disease type 1 patients.////Biochemical response to substrate reduction therapy versus enzyme replacement therapy in Gaucher disease type 1 patients.	Orphanet journal of rare diseases	CCL18			glucosylceramide////glucosylsphingosine	27008851	12	2016-03-01	https://pubmed.ncbi.nlm.nih.gov/?term=27008851
Prognostic elevation of CCL18 in blood of Gaucher patients has been confirmed by ELISA.	NA	patients	blood	CCL18	elevation	Gaucher patients	abstracts	Limitations in quantitation of the biomarker CCL18 in Gaucher disease blood samples by surface-enhanced laser desorption/ionization time-of-flight mass spectrometry.////Limitations in quantitation of the biomarker CCL18 in Gaucher disease blood samples by surface-enhanced laser desorption/ionization time-of-flight mass spectrometry.	Biochimica et biophysica acta	CCL18	Gaucher patients			17010683	4	2006-10-01	https://pubmed.ncbi.nlm.nih.gov/?term=17010683
Progressive storage of glucosylceramide in mononuclear cells and macrophages results in elevated levels of chitotriosidase and CCL18/PARC which may be used as biomarker to assess disease severity and efficacy of treatment.	NA	NA	NA	glucosylceramide	results	PARC////CCL18	abstracts	Laboratory and genetic evaluation of Gaucher disease.////Laboratory and genetic evaluation of Gaucher disease.	Wiener medizinische Wochenschrift (1946)	CCL18			glucosylceramide	20714811	6	2010-12-01	https://pubmed.ncbi.nlm.nih.gov/?term=20714811
Protective effect of recombinant human erythropoietin in type II Gaucher disease patient cells by scavenging endoplasmic reticulum stress.	NA	patients	NA	erythropoietin	effect	type II Gaucher disease	titles	Protective effect of recombinant human erythropoietin in type II Gaucher disease patient cells by scavenging endoplasmic reticulum stress.////Protective effect of recombinant human erythropoietin in type II Gaucher disease patient cells by scavenging endoplasmic reticulum stress.	Biomedicine & pharmacotherapy = Biomedecine & pharmacotherapie	EPO	type II Gaucher disease			21775095		2011-08-01	https://pubmed.ncbi.nlm.nih.gov/?term=21775095
Quite unexpectedly, the pro-inflammatory cytokine profile does not seem to be the product of Gaucher cells, which instead display anti-inflammatory characteristics with the expression of CD163 and IL1-Ra [45].	NA	NA	NA	Gaucher cells	display	IL1-Ra	body_nonstandard	Are Glucosylceramide-Related Sphingolipids Involved in the Increased Risk for Cancer in Gaucher Disease Patients? Review and Hypotheses.	Cancers	IL1RN	Gaucher cells			32085512	1	2020-02-01	https://pubmed.ncbi.nlm.nih.gov/?term=32085512
receptor antagonist, IL-6, TNF-alpha, and soluble IL-2 receptor levels were reported in Gaucher disease type 1 patients compared to normal controls [109].	GD1	NA	NA	TNF-alpha////IL-6////IL-2	reported	Gaucher disease type 1	body_introduction	Glycosphingolipids and neuroinflammation in Parkinson's disease.	Molecular neurodegeneration	TNF////IL6////IL2	Gaucher disease type 1			33069254		2020-10-01	https://pubmed.ncbi.nlm.nih.gov/?term=33069254
Reduced levels of BDNF (p=0.004) and elevated levels of TNF-a (p=0.017) and IL-4 (p=0.035) were also found in the GD group.	NA	NA	NA	TNF-a	found	GD group	abstracts	The modulation of inflammatory parameters, Brain-derived neurotrophic factor levels and global histone H4 acetylation status in peripheral blood of patients with Gaucher disease type 1.////The modulation of inflammatory parameters, Brain-derived neurotrophic factor levels and global histone H4 acetylation status in peripheral blood of patients with Gaucher disease type 1.	Clinical biochemistry	TNF	GD group			27865783	1	2017-03-01	https://pubmed.ncbi.nlm.nih.gov/?term=27865783
Regular monitoring of chitotriosidase, or PARC/CCL18 in chitotriosidase-deficient individuals, with sensitive assays is widely applied in Gaucher clinics and assists in clinical decision making.	NA	NA	NA	CCL18////PARC	applied	Gaucher	body_nonstandard	Biomarkers in the diagnosis of lysosomal storage disorders: proteins, lipids, and inhibodies.////Biomarkers in the diagnosis of lysosomal storage disorders: proteins, lipids, and inhibodies.	Journal of inherited metabolic disease	CCL18	Gaucher			21445610	32	2011-06-01	https://pubmed.ncbi.nlm.nih.gov/?term=21445610
Regular monitoring of enzyme chitotriosidase and pulmonary and activation-regulated chemokines are useful to confirm the diagnosis and effectiveness of GD treatment.	NA	NA	NA	pulmonary and activation-regulated chemokines	confirm	GD	abstracts	Gaucher disease and its treatment options.////Gaucher disease and its treatment options.	The Annals of pharmacotherapy	CCL18	GD			24259734	32	2013-09-01	https://pubmed.ncbi.nlm.nih.gov/?term=24259734
Relative mRNA expression levels of HSF1, ATF6 and PERK were probed by quantitative RT-PCR to verify knockdown of HSF1, ATF6 and PERK ( B ) in L444P GC fibroblasts after specific siRNA treatment—mRNA expression levels normalized to that of non-targeting siRNA treated cells after correction for GAPDH levels.	NA	in vitro	fibroblasts	HSF1	verify	GC	figure_captions	Chemical and biological approaches synergize to ameliorate protein-folding diseases.////Chemical and biological approaches synergize to ameliorate protein-folding diseases.	Cell	IL6			GC	18775310	170	2008-09-01	https://pubmed.ncbi.nlm.nih.gov/?term=18775310
SDF1 expression was similar in control and Gaucher disease hMacs, whereas CXCR4 expression was 89% lower in Gaucher disease hMacs than in control macrophages ( P = 0.0054).	NA	NA	macrophages	SDF1////CXCR4	was similar////was////was lower	Gaucher disease	body_results	Macrophage models of Gaucher disease for evaluating disease pathogenesis and candidate drugs.////Macrophage models of Gaucher disease for evaluating disease pathogenesis and candidate drugs.	Science translational medicine	CXCL12////CXCR4	Gaucher disease			24920659	47	2014-06-01	https://pubmed.ncbi.nlm.nih.gov/?term=24920659
Secretion of IL-6 by GD macrophages was also significantly higher than in controls (Fig. 2C).	NA	NA	NA	IL-6	Secretion	GD	body_results	Gaucher iPSC-derived macrophages produce elevated levels of inflammatory mediators and serve as a new platform for therapeutic development.////Gaucher iPSC-derived macrophages produce elevated levels of inflammatory mediators and serve as a new platform for therapeutic development.	Stem cells (Dayton, Ohio)	IL6	GD			24801745	22	2014-09-01	https://pubmed.ncbi.nlm.nih.gov/?term=24801745
serum CCL18 (p = 0.001), splenectomy (p=0.02) and treatment with ELI-SRT (p < 0.001) were most predictive of plasma lyso-GL 1 levels after adjusting for each other and for all other variables mentioned above.	NA	NA	serum	CCL18	were	lyso-GL 1	body_results	Glucosylsphingosine is a key biomarker of Gaucher disease.////Glucosylsphingosine is a key biomarker of Gaucher disease.	American journal of hematology	CCL18			lyso-GL 1	27441734	32	2016-11-01	https://pubmed.ncbi.nlm.nih.gov/?term=27441734
Serum levels of ChT1 in patients with type 1 GD reflect the burden of lipid-laden macrophages, and ChT1 is used to help determine the dosing of recombinant GCase and to follow the response to ERT (5, 6, 32). IL-6 and CCL-18 are also used as biomarkers of GD (33), particularly in the 6% of the human population harboring a mutation in the ChT1 gene that abrogates its expression (7, 31).	NA	NA	NA	CCL-18	used	GD	body_results	Gaucher iPSC-derived macrophages produce elevated levels of inflammatory mediators and serve as a new platform for therapeutic development.////Gaucher iPSC-derived macrophages produce elevated levels of inflammatory mediators and serve as a new platform for therapeutic development.	Stem cells (Dayton, Ohio)	CCL18	GD			24801745	22	2014-09-01	https://pubmed.ncbi.nlm.nih.gov/?term=24801745
Serum PARC concentrations are correlated with visceral Gaucher disease and with key clinical responses to enzyme complementation.	NA	NA	serum	PARC	correlated	Gaucher disease	abstracts	Clinical evaluation of chemokine and enzymatic biomarkers of Gaucher disease.////Clinical evaluation of chemokine and enzymatic biomarkers of Gaucher disease.	Blood cells, molecules & diseases	CCL18	Gaucher disease			16125420	38	2005-10-01	https://pubmed.ncbi.nlm.nih.gov/?term=16125420
Serum PARC concentrations were elevated 10-40-fold in patients with Gaucher disease compared with 67 healthy controls, without overlap (P<0.0001).	NA	patients	serum	PARC	fold	Gaucher disease	abstracts	Clinical evaluation of chemokine and enzymatic biomarkers of Gaucher disease.////Clinical evaluation of chemokine and enzymatic biomarkers of Gaucher disease.	Blood cells, molecules & diseases	CCL18	Gaucher disease			16125420	38	2005-10-01	https://pubmed.ncbi.nlm.nih.gov/?term=16125420
Several biomarkers are elevated in Gaucher disease, including chitotriosidase, C-C motif chemokine 18 (CCL18), angiotensin-converting enzyme (ACE) and TRAP.	NA	NA	NA	Gaucher disease	including////elevated	CCL18////C-C motif chemokine 18	body_introduction	ELIGLUSTAT TARTRATE: Glucosylceramide Synthase Inhibitor Treatment of Type 1 Gaucher Disease.////ELIGLUSTAT TARTRATE: Glucosylceramide Synthase Inhibitor Treatment of Type 1 Gaucher Disease.	Drugs of the future	CCL18////CXCR1	Gaucher disease			22563139	30	2010-08-01	https://pubmed.ncbi.nlm.nih.gov/?term=22563139
Several biomarkers are in widespread use for monitoring GD, such as: tartrate-resistant acid phosphatase (TRAP), angiotensin-converting enzyme (ACE), chitotriosidase,54 ferritin,55 pulmonary and activation-regulated chemokine (PARC/CCL18/macrophage inhibitory protein-4)56 and more recently glucosylsphingosine.9,57 Recently a link between lysolipids, immune activation and GD associated gamopathies…	NA	NA	NA	GD	monitoring	PARC////CCL18////pulmonary and activation-regulated chemokine	body_nonstandard	Imiglucerase in the management of Gaucher disease type 1: an evidence-based review of its place in therapy.////Imiglucerase in the management of Gaucher disease type 1: an evidence-based review of its place in therapy.	Core evidence	CCL18	GD			27790078	5	2016-01-01	https://pubmed.ncbi.nlm.nih.gov/?term=27790078
Several cytokines have increased levels in Gaucher disease and have been implicated in pathophysiology of the disease including interleukin-1α (IL-1α), interleukin-1β (IL-β), IL-1 receptor antagonist (IL-1Ra), soluble IL2 receptor (sIL-2R), IL-6, IL-8, IL-10, IL-18, hepatocyte growth factor (HGF), macrophage colony-stimulating factor (MCSF), macrophage-inflammatory protein-1 (MIP-1), pulmonary an…	NA	NA	NA	cytokines////Gaucher disease////HGF////IL-18////hepatocyte growth factor////IL-10	increased////implicated	Gaucher disease////IL-1Ra////IL-1α////interleukin-1α////IL-1////interleukin-1β////IL2////transforming growth factor////tumor necrosis factor-alpha////pulmonary and activation regulated chemokine////PARC////HGF////macrophage colony-stimulating factor////TGFβ1////TNFα////MCSF	body_introduction	Immunological cell type characterization and Th1-Th17 cytokine production in a mouse model of Gaucher disease.////Immunological cell type characterization and Th1-Th17 cytokine production in a mouse model of Gaucher disease.	Molecular genetics and metabolism	x_cytokine////x_cytokine////IL1RN////x_cytokine////IL1A////x_cytokine////Interleukin-1////x_cytokine////IL1B////x_cytokine////IL2////Transforming Growth Factor////TNF////CCL18////MET////CSF1////TGFB1////x_cytokine////Transforming Growth Factor////x_cytokine////TNF////x_cytokine////CCL18////x_cytokine////MET////x_cytokine////CSF1////x_cytokine////TGFB1////MET////Transforming Growth Factor////MET//…	Gaucher disease			22595426	12	2012-07-01	https://pubmed.ncbi.nlm.nih.gov/?term=22595426
Similarly, Dekker et al, have reported correlation of lyso-GL1 with markers of significant disease burden [14] and Rolfs and colleagues compared lyso-GL1 against biomarkers chitotriosidase and CCL18 [24].	NA	NA	NA	lyso-GL1	compared	CCL18	body_results	Glucosylsphingosine is a key biomarker of Gaucher disease.////Glucosylsphingosine is a key biomarker of Gaucher disease.	American journal of hematology	CCL18			lyso-GL1	27441734	32	2016-11-01	https://pubmed.ncbi.nlm.nih.gov/?term=27441734
Standard diagnostic procedures of GD include measurement of GBA activity, genetic analysis, as well as detection of biomarkers such as chitotriosidase, chemokine (C-C motif) ligand 18 (CCL18) and glucosylsphingosine.^14 Early diagnosis of GD may be promoted through suitable techniques.	NA	NA	NA	GD	include	GBA////C-C////CCL18	body_introduction	Successful newborn screening for Gaucher disease using fluorometric assay in China.////Successful newborn screening for Gaucher disease using fluorometric assay in China.	Journal of human genetics	CXCR1////CCL18	GD	GBA		28356566	2	2017-08-01	https://pubmed.ncbi.nlm.nih.gov/?term=28356566
Taken together, our findings suggest that M-CSF increases self-renewal, proliferation, neuronal differentiation and neuronal morphogenesis of Gba^−/− NSCs.	NA	NA	NA	M-CSF	increases	Gba	body_results	Defective Self-Renewal and Differentiation of GBA-Deficient Neural Stem Cells Can Be Restored By Macrophage Colony-Stimulating Factor.////Defective Self-Renewal and Differentiation of GBA-Deficient Neural Stem Cells Can Be Restored By Macrophage Colony-Stimulating Factor.	Molecules and cells	CSF1		Gba		26282862	1	2015-09-01	https://pubmed.ncbi.nlm.nih.gov/?term=26282862
Taking under consideration the existence of recessively inherited deficiency in chitotriosidase with an incidence of about 6% in Caucasian (Boot et al. 1998), CCL18 can be used as an alternative biomarker for enzyme-deficient GD patients (Boot et al. 2004,2006; Deegan et al. 2005).	NA	patients	NA	CCL18	used	GD patients	body_nonstandard	Human chitinases and chitinase-like proteins as indicators for inflammation and cancer.////Human chitinases and chitinase-like proteins as indicators for inflammation and cancer.	Biomarker insights	CCL18	GD patients			19662198	57	2007-05-01	https://pubmed.ncbi.nlm.nih.gov/?term=19662198
The activation and development of osteoclasts by disrupting RANKL-induced tumor necrosis factor receptor associated factor 6 (TRAF6) and proto-oncogene tyrosine-protein kinase Src (c-SRC) in lipid rafts is prevented by inhibitors of glucosylceramide synthase	NA	NA	NA	RANKL////tumor necrosis factor	induced////prevented	tumor necrosis factor////glucosylceramide	body_nonstandard	Defective Sphingolipids Metabolism and Tumor Associated Macrophages as the Possible Links Between Gaucher Disease and Blood Cancer Development.////Defective Sphingolipids Metabolism and Tumor Associated Macrophages as the Possible Links Between Gaucher Disease and Blood Cancer Development.	International journal of molecular sciences	TNFSF11////Tumor Necrosis Factors////TNFSF11////Tumor Necrosis Factors			glucosylceramide	30781349	2	2019-02-01	https://pubmed.ncbi.nlm.nih.gov/?term=30781349
The authors demonstrated that plasma glucosylsphingosine levels were correlated well with chitotriosidase and CCL18.	NA	NA	NA	glucosylsphingosine	correlated	CCL18	body_introduction	Glucosylsphingosine is a highly sensitive and specific biomarker for primary diagnostic and follow-up monitoring in Gaucher disease in a non-Jewish, Caucasian cohort of Gaucher disease patients.////Glucosylsphingosine is a highly sensitive and specific biomarker for primary diagnostic and follow-up monitoring in Gaucher disease in a non-Jewish, Caucasian cohort of Gaucher disease patients.	PloS one	CCL18			glucosylsphingosine	24278166	47	2013-01-01	https://pubmed.ncbi.nlm.nih.gov/?term=24278166
The CCL18/PARC levels are lower than in Gaucher patients (range 174.8-10798.7, median 2538.2 ng/ml, n=28, P<0.001).	NA	patients	NA	PARC////CCL18	are lower	Gaucher patients	abstracts	Elevated plasma chemokine CCL18/PARC in beta-thalassemia.////Elevated plasma chemokine CCL18/PARC in beta-thalassemia.	Blood cells, molecules & diseases	CCL18	Gaucher patients			16137900	2	2005-08-31	https://pubmed.ncbi.nlm.nih.gov/?term=16137900
The chemokine CCL18 was demonstrated to act as a surrogate marker produced by Gaucher cells, and has also been described as a reliable biomarker [3].	NA	NA	gaucher cells	CCL18	produced	Gaucher cells	body_introduction	Glucosylsphingosine Causes Hematological and Visceral Changes in Mice-Evidence for a Pathophysiological Role in Gaucher Disease.////Glucosylsphingosine Causes Hematological and Visceral Changes in Mice-Evidence for a Pathophysiological Role in Gaucher Disease.	International journal of molecular sciences	CCL18	Gaucher cells			29053611	7	2017-10-01	https://pubmed.ncbi.nlm.nih.gov/?term=29053611
The chemokine CCL18, also named PARC, is overexpressed by Gaucher cells as well.	NA	NA	gaucher cells	CCL18////PARC	named PARC////overexpressed	PARC////Gaucher cells	body_unnamed	Elevation of glycoprotein nonmetastatic melanoma protein B in type 1 Gaucher disease patients and mouse models.////Elevation of glycoprotein nonmetastatic melanoma protein B in type 1 Gaucher disease patients and mouse models.	FEBS open bio	CCL18////CCL18////CCL18	Gaucher cells			27642553	17	2016-09-01	https://pubmed.ncbi.nlm.nih.gov/?term=27642553
The chemokine CCL18/PARC (Chemokine (C-C motif) ligand 18; Pulmonary and activation-regulated chemokine) serves as an alternative plasma marker of Gaucher cells, being 20 to 50-fold elevated plasma of type 1 GD patients [138,139].	GD1	NA	NA	Pulmonary and activation-regulated chemokine	serves	Gaucher cells////type 1 GD	body_nonstandard	Glucocerebrosidase: Functions in and Beyond the Lysosome.	Journal of clinical medicine	CCL18	Gaucher cells////type 1 GD			32182893		2020-03-01	https://pubmed.ncbi.nlm.nih.gov/?term=32182893
The discovery of prospective biomarkers of osteonecrosis such as CCL18/PARC, CXCL8/IL-8, CCL5/RANTES, CCL3/MIP-1a, CCL4/MIP-1b, particularly during recurrent episodes occurring despite enzyme treatment, has the potential radically to change practices in the management of Gaucher disease and should improve therapeutic monitoring and prognostic evaluation.	NA	NA	NA	CCL18////RANTES////CXCL8////CCL5////CCL3////MIP-1a////MIP-1b////PARC////CCL4////IL-8	change	Gaucher disease	abstracts	Biomarkers for osteonecrosis in Gaucher disease.////Biomarkers for osteonecrosis in Gaucher disease.	Expert opinion on medical diagnostics	CCL18////CCL5////CXCL8////CCL3////CCL4	Gaucher disease			23480616	1	2012-01-01	https://pubmed.ncbi.nlm.nih.gov/?term=23480616
The expression of the critical chemokine CCL5 was 40% lower in Gaucher disease macrophages than in controls (P = 0.015).	NA	NA	macrophages	chemokine CCL5	was	Gaucher disease	body_results	Macrophage models of Gaucher disease for evaluating disease pathogenesis and candidate drugs.////Macrophage models of Gaucher disease for evaluating disease pathogenesis and candidate drugs.	Science translational medicine	CCL5	Gaucher disease			24920659	47	2014-06-01	https://pubmed.ncbi.nlm.nih.gov/?term=24920659
The Gaucher phenotype did not have any effect on the basal level of STAT phosphorylation, but the extent of IFNγ-induced STAT1 activation in the whole cell and in the nucleus were significantly lower in Gaucher-model cells (Fig.	NA	in vitro	gaucher cells	IFNγ	were lower	Gaucher-model	body_results	Alterations in the properties of the cell membrane due to glycosphingolipid accumulation in a model of Gaucher disease.////Alterations in the properties of the cell membrane due to glycosphingolipid accumulation in a model of Gaucher disease.	Scientific reports	IFNG	Gaucher-model			29317695	10	2018-01-01	https://pubmed.ncbi.nlm.nih.gov/?term=29317695
The highest TNF-a levels were observed in the most severe neuronopathic type of GD, exceeding those found in healthy individuals as well as patients with other lysosomal disorders.	neuropahtic GD	NA	NA	TNF-a	observed	GD	abstracts	Plasma tumor necrosis factor-a (TNF-a) levels in Gaucher disease.////Plasma tumor necrosis factor-a (TNF-a) levels in Gaucher disease.	Biochimica et biophysica acta	TNF	GD			8988238	24	1996-12-01	https://pubmed.ncbi.nlm.nih.gov/?term=8988238
The hydrolase chitotriosidase and the chemokine (C-C motif) ligand 18 (CCL18) are secreted by activated macrophages, including Gaucher cells [23,24], and are thus indicative of overall Gaucher cell burden.	NA	NA	gaucher cells	CCL18////C-C	secreted////are indicative	Gaucher cells////Gaucher cell	body_introduction	Value of Glucosylsphingosine (Lyso-Gb1) as a Biomarker in Gaucher Disease: A Systematic Literature Review.	International journal of molecular sciences	CCL18////CXCR1	Gaucher cells////Gaucher cell			32998334		2020-09-01	https://pubmed.ncbi.nlm.nih.gov/?term=32998334
The inclusion of PtdSer and HSF in the beta-glucosidase assay medium lowered the Ki of N-hexyl-O-glucosylsphingosine 20-fold.	NA	NA	NA	HSF	lowered	Ki////glucosylsphingosine	abstracts	Characterization of the phospholipid requirement of a rat liver beta-glucosidase.////Characterization of the phospholipid requirement of a rat liver beta-glucosidase.	The Biochemical journal	IL6////TNFRSF8////IL6			glucosylsphingosine	6517862	4	1984-12-01	https://pubmed.ncbi.nlm.nih.gov/?term=6517862
The lipid states of Krabbe and Gaucher patient-derived fibroblasts displayed strong positive correlations with the functional lipid annotations for IL-6 release, predictive of a hyperinflammatory response (Figure 5D).	NA	in vitro	fibroblasts	Gaucher patient	displayed	IL-6	body_results	A Conserved Circular Network of Coregulated Lipids Modulates Innate Immune Responses.////A Conserved Circular Network of Coregulated Lipids Modulates Innate Immune Responses.	Cell	IL6	Gaucher patient			26095250	52	2015-07-01	https://pubmed.ncbi.nlm.nih.gov/?term=26095250
The migration inhibition factor (MIF) test performed with the lymphocytes of our patients was positive to glucocerebroside in four of 17 patients, to glucocerebrosidase in four of 19 patients, and to the extracts of the spleen of a patient with Gaucher's disease in three of eight patients.	NA	patients	NA	MIF	glucocerebroside	glucocerebroside	abstracts	Gaucher's disease: a disease with chronic stimulation of the immune system.////Gaucher's disease: a disease with chronic stimulation of the immune system.	Archives of pathology & laboratory medicine	MIF			glucocerebroside	7049116	27	1982-08-01	https://pubmed.ncbi.nlm.nih.gov/?term=7049116
The observed differences in chemokine profiles between control and Gaucher disease macrophages prompted an evaluation of chemotaxis, focusing on the crucial chemokines SDF1, RANTES (CCL5), and MIP-1α.	NA	NA	NA	Gaucher disease	prompted	CCL5////RANTES////SDF1////MIP-1α	body_results	Macrophage models of Gaucher disease for evaluating disease pathogenesis and candidate drugs.////Macrophage models of Gaucher disease for evaluating disease pathogenesis and candidate drugs.	Science translational medicine	CCL5////CXCL12////CCL3	Gaucher disease			24920659	47	2014-06-01	https://pubmed.ncbi.nlm.nih.gov/?term=24920659
The plasma concentration of chemokine CCL18 is close to normal in mildly affected type 1 GD patients.	GD1	patients	plasma	CCL18	is close////is	type 1 GD	body_discussion	Elevation of glycoprotein nonmetastatic melanoma protein B in type 1 Gaucher disease patients and mouse models.////Elevation of glycoprotein nonmetastatic melanoma protein B in type 1 Gaucher disease patients and mouse models.	FEBS open bio	CCL18	type 1 GD			27642553	17	2016-09-01	https://pubmed.ncbi.nlm.nih.gov/?term=27642553
The primary hypothesis guiding this project is that both plasma chitotriosidase activity and CCL18 level relate to visceral, hematological, and skeletal disease activity in GD patients.	NA	NA	plasma	CCL18	relate	GD patients	body_introduction	Plasma chitotriosidase activity versus CCL18 level for assessing type I Gaucher disease severity: protocol for a systematic review with meta-analysis of individual participant data.////Plasma chitotriosidase activity versus CCL18 level for assessing type I Gaucher disease severity: protocol for a systematic review with meta-analysis of individual participant data.	Systematic reviews	CCL18	GD patients			28427477	4	2017-04-01	https://pubmed.ncbi.nlm.nih.gov/?term=28427477
The purpose of this study was to ascertain whether polymorphism of the IL-6 promoter gene affects platelet counts among patients with Gaucher disease since it has been shown that in healthy individuals, the CC genotype is correlated with lower platelet counts.	NA	NA	NA	IL-6	affects	Gaucher disease	abstracts	Platelet counts and interleukin-6 (IL-6) promoter polymorphism in patients with Gaucher disease.////Platelet counts and interleukin-6 (IL-6) promoter polymorphism in patients with Gaucher disease.	Hematology (Amsterdam, Netherlands)	IL6	Gaucher disease			14668030		2003-12-01	https://pubmed.ncbi.nlm.nih.gov/?term=14668030
The reduced IL-10 secretion observed in GD mouse macrophages may be relevant to explain the increase in inflammation that is often observed in GD [43].	NA	mouse model	macrophages	IL-10	observed	GD	body_conclusions	The influence of genetic variability and proinflammatory status on the development of bone disease in patients with Gaucher disease.////The Influence of Genetic Variability and Proinflammatory Status on the Development of Bone Disease in Patients with Gaucher Disease.	PloS one	IL10	GD			25978039	7	2015-01-01	https://pubmed.ncbi.nlm.nih.gov/?term=25978039
The routinely available biomarkers, chitotriosidase and CCL-18, are epiphenomena caused by activation of macrophages after uptake of glucosylceramide.	NA	NA	NA	CCL-18	caused	glucosylceramide	body_introduction	Glucosylsphingosine is a highly sensitive and specific biomarker for primary diagnostic and follow-up monitoring in Gaucher disease in a non-Jewish, Caucasian cohort of Gaucher disease patients.////Glucosylsphingosine is a highly sensitive and specific biomarker for primary diagnostic and follow-up monitoring in Gaucher disease in a non-Jewish, Caucasian cohort of Gaucher disease patients.	PloS one	CCL18			glucosylceramide	24278166	47	2013-01-01	https://pubmed.ncbi.nlm.nih.gov/?term=24278166
The secondary hypothesis is that the accuracy of chitotriosidase activity and CCL18 may differ in discriminating GD patients according to disease severity.	NA	NA	NA	CCL18	differ	GD patients	body_introduction	Plasma chitotriosidase activity versus CCL18 level for assessing type I Gaucher disease severity: protocol for a systematic review with meta-analysis of individual participant data.////Plasma chitotriosidase activity versus CCL18 level for assessing type I Gaucher disease severity: protocol for a systematic review with meta-analysis of individual participant data.	Systematic reviews	CCL18	GD patients			28427477	4	2017-04-01	https://pubmed.ncbi.nlm.nih.gov/?term=28427477
The serum of patients with GD has elevated levels of inflammatory mediators including TNF alpha, IL-6, and IL-1beta, and it is believed that these cytokines are produced by Gaucher macrophages (5).	NA	patients	serum	cytokines////GD	produced////including	Gaucher////IL-6////TNF alpha////IL-1beta	body_introduction	Gaucher iPSC-derived macrophages produce elevated levels of inflammatory mediators and serve as a new platform for therapeutic development.////Gaucher iPSC-derived macrophages produce elevated levels of inflammatory mediators and serve as a new platform for therapeutic development.	Stem cells (Dayton, Ohio)	x_cytokine////IL6////TNF////IL1B	Gaucher////GD			24801745	22	2014-09-01	https://pubmed.ncbi.nlm.nih.gov/?term=24801745
The vast number of storage macrophages in Gaucher patients has facilitated the discovery of suitable plasma markers like chitotriosidase and CCL18.	NA	NA	NA	Gaucher patients	facilitated	CCL18	abstracts	Plasma chitotriosidase and CCL18 as surrogate markers for granulomatous macrophages in sarcoidosis.////Plasma chitotriosidase and CCL18 as surrogate markers for granulomatous macrophages in sarcoidosis.	Clinica chimica acta; international journal of clinical chemistry	CCL18	Gaucher patients			19808030	23	2010-01-01	https://pubmed.ncbi.nlm.nih.gov/?term=19808030
Therefore, regular monitoring of CT or PARC/CCL18 in CT-deficient patients, along with radiological monitoring of the bone marrow and skeleton, and other sensitive assays are needed to confirm the diagnostic of GD and to monitor the effectiveness of treatment.	NA	patients	NA	CCL18////PARC	confirm	GD	body_nonstandard	Eliglustat tartrate for the treatment of adults with type 1 Gaucher disease.////Eliglustat tartrate for the treatment of adults with type 1 Gaucher disease.	Drug design, development and therapy	CCL18	GD			26345314	9	2015-01-01	https://pubmed.ncbi.nlm.nih.gov/?term=26345314
These cells with GCase defects lead to increasing numbers of GC-containing cells with the resultant release of additional IFN-γ, IL-4, IL-6, and TGF-β cytokines, as well as the promotion of continued development of Th1- and Th2-cell-mediated inflammation. IL-6 induces T-follicular cells (Tfh), leading to activation of B cells in germinal centers and hypergammaglobulinemia.	NA	NA	NA	GCase////GC////IL-4	lead////containing////TGF-β	IL-6////TGF-β////IFN-γ////GC////IL-4////cytokines	body_nonstandard	Immunological cells and functions in Gaucher disease.////Immunological cells and functions in Gaucher disease.	Critical reviews in oncogenesis	IL6////Transforming Growth Factor beta////IFNG////////IL4////x_cytokine////IL4////Transforming Growth Factor beta		GCase	GC	23510064	20	2013-01-01	https://pubmed.ncbi.nlm.nih.gov/?term=23510064
These mice had GCase activity levels not surpassing 15–20% activity of the WT (similar to GD type 1 patients); although there was no observable Gaucher cells, the mice showed some GD features such as lymphadenopathy, anemia and generalized inflammation marked by elevation of TNF-α and IL-1β [69].	NA	mouse model	NA	GD	features	IL-1β	body_nonstandard	Induced Pluripotent Stem Cell Modeling of Gaucher's Disease: What Have We Learned?////Induced Pluripotent Stem Cell Modeling of Gaucher's Disease: What Have We Learned?	International journal of molecular sciences	IL1B	GD			28430167		2017-04-01	https://pubmed.ncbi.nlm.nih.gov/?term=28430167
These results suggest that M-CSF is an effective adjuvant for improving neurogenic effects, and that M-CSF derived from BM-MSCs could be a critical factor for increasing the proliferation and neural differentiation of Gba^−/− NSCs.	NA	in vitro	neural stem cells	M-CSF	be factor	Gba	body_discussion	Defective Self-Renewal and Differentiation of GBA-Deficient Neural Stem Cells Can Be Restored By Macrophage Colony-Stimulating Factor.////Defective Self-Renewal and Differentiation of GBA-Deficient Neural Stem Cells Can Be Restored By Macrophage Colony-Stimulating Factor.	Molecules and cells	CSF1		Gba		26282862	1	2015-09-01	https://pubmed.ncbi.nlm.nih.gov/?term=26282862
These studies and phase 2-open label clinical trials showed reduction of biomarkers of Gaucher disease including chitotriosidase, CCL18, plasma glucocerebroside, glucosylsphingosine, and MIP1-β.	NA	patients	NA	Gaucher disease	including	glucosylsphingosine////MIP1-β////CCL18////glucocerebroside	body_nonstandard	Gaucher disease: Progress and ongoing challenges.////Gaucher disease: Progress and ongoing challenges.	Molecular genetics and metabolism	CCL4////CCL18	Gaucher disease		glucosylsphingosine////////glucocerebroside	27916601	26	2017-03-17	https://pubmed.ncbi.nlm.nih.gov/?term=27916601
These studies suggest that GC accumulation in MΦs triggers events that contribute to the increased production of MOs and PMNs chemo-attracting proteins (e.g., MCP1/CCL2, CXCL8/IL8, KC/CXCL1) as well as IL-1β, IFNγ, and TNFα in Gaucher disease (Table 1), which could cause the recruitment of PMNs and transformation of MOs into the effector MΦs and DCs to initiate inflammatory reactions in visceral …	NA	NA	NA	GC	contribute	TNFα////KC////Gaucher disease////IFNγ////IL8////IL-1β////MCP1////CXCL8////CCL2////CXCL1	body_nonstandard	Immunological cells and functions in Gaucher disease.////Immunological cells and functions in Gaucher disease.	Critical reviews in oncogenesis	TNF////CXCL1////////IFNG////CXCL8////IL1B////CCL2	Gaucher disease		GC	23510064	20	2013-01-01	https://pubmed.ncbi.nlm.nih.gov/?term=23510064
This concept is supported by the association of NO and the generation of ROS, including superoxide anions, hydroxyl radicals, lipid hydroperoxides, and hydrogen peroxide, which promote endothelial cell dysfunction directly or indirectly by promoting formation of lipid inflammatory mediators.^255 The enhancement of inflammatory and oxidative responses by long chain fatty acids^256 might implicate …	NA	NA	NA	GC	implicate	TNF-α////IFN-γ	body_nonstandard	Immunological cells and functions in Gaucher disease.////Immunological cells and functions in Gaucher disease.	Critical reviews in oncogenesis	TNF////IFNG			GC	23510064	20	2013-01-01	https://pubmed.ncbi.nlm.nih.gov/?term=23510064
This enzyme deficiency results in an accumulation of sphingolipids in the cells of GD patients, which may contribute to the dysregulation of the immune system, B-cell dysfunction and expression of specific cytokines such as interleukin (IL) -1, IL-6, IL-8, IL-10, and tumor necrosis factor (TNF).	NA	patients	NA	GD patients	contribute	IL-10////IL-8////cytokines////TNF////IL-6////tumor necrosis factor	abstracts	Simultaneous detection of Gaucher's disease and renal involvement of non-Hodgkin's lymphoma: the first Asian case report and a review of literature.////Simultaneous detection of Gaucher's disease and renal involvement of non-Hodgkin's lymphoma: the first Asian case report and a review of literature.	Annals of clinical and laboratory science	IL10////CXCL8////x_cytokine////TNF////IL6////Tumor Necrosis Factors	GD patients			22964618	1	2012-01-01	https://pubmed.ncbi.nlm.nih.gov/?term=22964618
Those results show that serum IL-6 is increased with GBA1 defects.	NA	NA	serum	IL-6	increased	GBA1	body_results	Activation of p38 Mitogen-Activated Protein Kinase in Gaucher's Disease.////Activation of p38 Mitogen-Activated Protein Kinase in Gaucher's Disease.	PloS one	IL6		GBA1		26312487	5	2015-01-01	https://pubmed.ncbi.nlm.nih.gov/?term=26312487
Thus numerous cytokines, chemokines and other molecules—including IL-1β, IL-6, IL-8, TNFα (Tumor Necrosis Factor), M-CSF (Macrophage-Colony Stimulating Factor), MIP-1β, IL-18, IL-10, TGFβ, CCL-18, chitotriosidase, CD14s, and CD163s—are present in increased amounts in Gaucher patients’ plasma and could be implicated in hematological and bone complications [14,15,16,17].	NA	patients	plasma	cytokines////IL-10////M-CSF////IL-6////TNFα////IL-1β////TGFβ////IL-8////CCL-18////Colony Stimulating Factor////IL-18////MIP-1β////Tumor Necrosis Factor	including////are present	IL-1β////Gaucher	body_nonstandard	A Review of Gaucher Disease Pathophysiology, Clinical Presentation and Treatments.////A Review of Gaucher Disease Pathophysiology, Clinical Presentation and Treatments.	International journal of molecular sciences	x_cytokine////IL1B////IL10////CSF1////IL6////TNF////x_cytokine////IL1B////Transforming Growth Factor beta////CXCL8////CCL18////CSF2////IL18////CCL4////Tumor Necrosis Factors	Gaucher			28218669	64	2017-02-01	https://pubmed.ncbi.nlm.nih.gov/?term=28218669
Thus, one can hypothesize that an accumulation of glucosylceramides or GM2 in Parkinson’s disease could participate to the production of CCL2 and to the recruitment of CCR2+ leucocytes into the brain.	NA	NA	NA	glucosylceramides////CCL2	participate////recruitment	CCL2////CCR2	body_introduction	Glycosphingolipids and neuroinflammation in Parkinson's disease.	Molecular neurodegeneration	CCL2////CCR2////CCL2////CCR2			glucosylceramides	33069254		2020-10-01	https://pubmed.ncbi.nlm.nih.gov/?term=33069254
Thus, the elevated IL-1beta, TNF-alpha and IL-6 levels may induce the bone manifestations, the neutrophil chemotaxis and the increased incidence of hyper-gammaglobulinemia present in GD patients.	NA	patients	NA	IL-6////TNF-alpha////IL-1beta	induce	GD patients	abstracts	Cytokines in Gaucher's disease.////Cytokines in Gaucher's disease.	European cytokine network	IL6////TNF////IL1B	GD patients			10400826	53	1999-06-01	https://pubmed.ncbi.nlm.nih.gov/?term=10400826
Time course analyses (12 to 28 wk) of INFy-regulated pro-inflammatory (13) and IL-4-regulated anti-inflammatory (11) cytokine/mediator networks showed tissue differential profiles in the lung and liver of the Gba1 mutant mice, implying that the lipid-storage macrophages were not functionally inert.	NA	mouse model	lung;liver	IL-4////cytokine	regulated////showed	cytokine////Gba1	abstracts	Global gene expression profile progression in Gaucher disease mouse models.////Global gene expression profile progression in Gaucher disease mouse models.	BMC genomics	IL4////x_cytokine////IL4////x_cytokine		Gba1		21223590	15	2011-01-01	https://pubmed.ncbi.nlm.nih.gov/?term=21223590
To confirm the secretion of this factor, we performed ELISAs and found that M-CSF levels were significantly elevated in the conditioned media of Gba^−/− NSCs co-cultured with BM-MSCs (Fig. 4C).	NA	in vitro	neural stem cells	M-CSF	elevated	Gba	body_results	Defective Self-Renewal and Differentiation of GBA-Deficient Neural Stem Cells Can Be Restored By Macrophage Colony-Stimulating Factor.////Defective Self-Renewal and Differentiation of GBA-Deficient Neural Stem Cells Can Be Restored By Macrophage Colony-Stimulating Factor.	Molecules and cells	CSF1		Gba		26282862	1	2015-09-01	https://pubmed.ncbi.nlm.nih.gov/?term=26282862
Type I GD cases showed a wide range of TNF-a levels ranging from normal to 2.5 x the highest control value.	GD1	patients	NA	Type I GD	showed	TNF-a	abstracts	Plasma tumor necrosis factor-a (TNF-a) levels in Gaucher disease.////Plasma tumor necrosis factor-a (TNF-a) levels in Gaucher disease.	Biochimica et biophysica acta	TNF	Type I GD			8988238	24	1996-12-01	https://pubmed.ncbi.nlm.nih.gov/?term=8988238
Type I GD patients with more severe clinical manifestations had significantly higher levels of IL-1beta, IL-1Ra and IL-6, relative to type I patients with milder disease.	GD1	patients	NA	Type I GD	had	IL-6////IL-1Ra////IL-1beta////type I patients	abstracts	Cytokines in Gaucher's disease.////Cytokines in Gaucher's disease.	European cytokine network	IL6////IL1RN////IL1B	Type I GD////Type I GD////type I patients			10400826	53	1999-06-01	https://pubmed.ncbi.nlm.nih.gov/?term=10400826
U87 GBA1 mutant cells displayed an increased production of interleukin-1β, both with and without inflammosome activation, α-syn accumulation and a higher rate of cell death in comparison with wild-type cells.	NA	in vitro	U87 GBA1 mutant cells	GBA1	displayed	interleukin-1β	abstracts	CRISPR/Cas9 Editing for Gaucher Disease Modelling.	International journal of molecular sciences	IL1B		GBA1		32380730		2020-05-01	https://pubmed.ncbi.nlm.nih.gov/?term=32380730
Using multiple linear regression we estimated the coefficients adjusted for age, spleen volume, liver volume, splenectomy status, serum chitotriosidase, serum CCL18, hemoglobin levels, platelet counts and mode of therapy without further selection of variables to identify clinical indicators independently predictive of plasma lyso-GL1 levels.	NA	NA	NA	CCL18	identify	lyso-GL1	body_results	Glucosylsphingosine is a key biomarker of Gaucher disease.////Glucosylsphingosine is a key biomarker of Gaucher disease.	American journal of hematology	CCL18			lyso-GL1	27441734	32	2016-11-01	https://pubmed.ncbi.nlm.nih.gov/?term=27441734
Using surface-enhanced laser distortion/ionization time of flight (SELDI-TOF) mass spectrometric analyses, we discovered massive overproduction and secretion by Gaucher cells of the pulmonary and activation-regulated chemokine (PARC/CCL18), of which the messenger RNA (mRNA) was previously observed to be up-regulated in the spleen of a patient with Gaucher disease (Moran et al. 2000; Boot et al. 2…	NA	NA	NA	pulmonary and activation-regulated chemokine////CCL18////PARC	regulated	Gaucher disease	body_nonstandard	Biomarkers in the diagnosis of lysosomal storage disorders: proteins, lipids, and inhibodies.////Biomarkers in the diagnosis of lysosomal storage disorders: proteins, lipids, and inhibodies.	Journal of inherited metabolic disease	CCL18	Gaucher disease			21445610	32	2011-06-01	https://pubmed.ncbi.nlm.nih.gov/?term=21445610
V394L/V394L and D409 V/null revealed a direct relationship between GlcCer accumulation and activation of INFγ and IL4 regulated networks [77].	NA	NA	NA	GlcCer	relationship	IL4	body_nonstandard	Induced Pluripotent Stem Cell Modeling of Gaucher's Disease: What Have We Learned?////Induced Pluripotent Stem Cell Modeling of Gaucher's Disease: What Have We Learned?	International journal of molecular sciences	IL4			GlcCer	28430167		2017-04-01	https://pubmed.ncbi.nlm.nih.gov/?term=28430167
We also found that M-CSF levels were significantly decreased in Gba^−/− NSCs compared with those in Gba^+/− NSCs (Fig. 4C), neither of which were co-cultured with BM-MSCs.	NA	in vitro	neural stem cells; bone marrow-derived mesenchymal stem cells	M-CSF	decreased////compared	Gba	body_results	Defective Self-Renewal and Differentiation of GBA-Deficient Neural Stem Cells Can Be Restored By Macrophage Colony-Stimulating Factor.////Defective Self-Renewal and Differentiation of GBA-Deficient Neural Stem Cells Can Be Restored By Macrophage Colony-Stimulating Factor.	Molecules and cells	CSF1		Gba		26282862	1	2015-09-01	https://pubmed.ncbi.nlm.nih.gov/?term=26282862
We conclude that recombinant GCase and the two chaperones inhibited production of the inflammatory cytokines TNF alpha, IL-6, and IL-1beta, while stimulating expression of the anti-inflammatory cytokine IL-10.	NA	NA	NA	GCase	inhibited	cytokines////TNF alpha////IL-6////IL-1beta	body_results	Gaucher iPSC-derived macrophages produce elevated levels of inflammatory mediators and serve as a new platform for therapeutic development.////Gaucher iPSC-derived macrophages produce elevated levels of inflammatory mediators and serve as a new platform for therapeutic development.	Stem cells (Dayton, Ohio)	x_cytokine////TNF////IL6////IL1B		GCase		24801745	22	2014-09-01	https://pubmed.ncbi.nlm.nih.gov/?term=24801745
We conclude that serum levels of M-CSF, sCD14 and IL8 are increased in type 1 Gaucher disease.	GD1	NA	serum	M-CSF////IL8	increased	type 1 Gaucher disease	abstracts	Elevated levels of M-CSF, sCD14 and IL8 in type 1 Gaucher disease.////Elevated levels of M-CSF, sCD14 and IL8 in type 1 Gaucher disease.	Blood cells, molecules & diseases	CSF1////CXCL8	type 1 Gaucher disease			9236158	32	1997-08-01	https://pubmed.ncbi.nlm.nih.gov/?term=9236158
We found increased production of interleukin-1β (IL-1β) (Figure 3A), but no production of tumor necrosis factor α (TNFα) nor interleukin-6 (IL-6) (Figure 3B,C) by U87 GBA1 mutant cells.	NA	in vitro	U87 GBA1 mutant cells	tumor necrosis factor α////TNFα	production	interleukin-6////GBA1////IL-6	body_results	CRISPR/Cas9 Editing for Gaucher Disease Modelling.	International journal of molecular sciences	TNF////IL6////TNF		GBA1		32380730		2020-05-01	https://pubmed.ncbi.nlm.nih.gov/?term=32380730
We found significantly increased expression of IL-1beta mRNA, as well as a trend to elevated TNF-alpha mRNA in Gaucher patients relative to healthy individuals.	NA	patients	NA	TNF-alpha////IL-1beta	elevated	Gaucher patients////TNF-alpha	abstracts	Cytokine mRNA in Gaucher disease.////Cytokine mRNA in Gaucher disease.	Blood cells, molecules & diseases	TNF////IL1B////IL1B////TNF	Gaucher patients			9446753	9	1997-12-01	https://pubmed.ncbi.nlm.nih.gov/?term=9446753
We found that EPO stimulated signaling pathways, enhanced the expression of glucocerebrosidase, reduced ER stress marker protein levels, and enhanced the proliferation rate of type II GD patient cells.	GD2	in vitro	cells	EPO	enhanced	type II GD	abstracts	Protective effect of recombinant human erythropoietin in type II Gaucher disease patient cells by scavenging endoplasmic reticulum stress.////Protective effect of recombinant human erythropoietin in type II Gaucher disease patient cells by scavenging endoplasmic reticulum stress.	Biomedicine & pharmacotherapy = Biomedecine & pharmacotherapie	EPO	type II GD			21775095		2011-08-01	https://pubmed.ncbi.nlm.nih.gov/?term=21775095
We have observed high levels of IL-4, MIP-1α, MIP-1β, and TNFα, and lower levels of anti-inflammatory IL-10 and IL-13 in GD male and female patients compared with healthy control participants.	NA	patients	NA	IL-4	compared	IL-13////TNFα////MIP-1α////MIP-1β////IL-10////GD male	body_conclusions	The influence of genetic variability and proinflammatory status on the development of bone disease in patients with Gaucher disease.////The Influence of Genetic Variability and Proinflammatory Status on the Development of Bone Disease in Patients with Gaucher Disease.	PloS one	IL4////IL13////IL4////TNF////IL4////CCL3////IL4////CCL4////IL4////IL10////IL4	GD male			25978039	7	2015-01-01	https://pubmed.ncbi.nlm.nih.gov/?term=25978039
We now demonstrate elevation of IFNβ levels in neurons and activation of the type 1 IFN response in mouse models of neuronopathic Gaucher disease (nGD), but to a much lower extent, or absent completely, in other LSD mouse models.	neuronopathic GD	mouse model	neurons	IFNβ	elevation////response	neuronopathic Gaucher disease////IFN	body_introduction	Induction of the type I interferon response in neurological forms of Gaucher disease.////Induction of the type I interferon response in neurological forms of Gaucher disease.	Journal of neuroinflammation	IFNB1////IFNB1////IFNA1	neuronopathic Gaucher disease			27175482	10	2016-05-01	https://pubmed.ncbi.nlm.nih.gov/?term=27175482
We propose an easily reproducible semi-quantitative scoring system and confirm that patients with GD have abnormal MRI bone findings and enhanced osteoclast activity possibly due to elevated CCL-3.	NA	patients	NA	GD	have	CCL-3	abstracts	Evaluation of bone involvement in patients with Gaucher disease: a semi-quantitative magnetic resonance imaging method (using ROI estimation of bone lesion) as an alternative method to semi-quantitative methods used so far.////Evaluation of bone involvement in patients with Gaucher disease: a semi-quantitative magnetic resonance imaging method (using ROI estimation of bone lesion) as an alternati…	European journal of haematology	CCL3	GD			25645321	3	2015-10-01	https://pubmed.ncbi.nlm.nih.gov/?term=25645321
We report that in plasma of symptomatic patients with Gaucher disease the chemokine CCL18 is on average 29-fold elevated, without overlap between patient and control values (median control plasma level is 33 ng/mL, range, 10-72 ng/mL; median Gaucher plasma level is 948 ng/mL, range, 237-2285 ng/mL).	NA	patients	plasma	Gaucher disease	is	CCL18	abstracts	Marked elevation of the chemokine CCL18/PARC in Gaucher disease: a novel surrogate marker for assessing therapeutic intervention.////Marked elevation of the chemokine CCL18/PARC in Gaucher disease: a novel surrogate marker for assessing therapeutic intervention.	Blood	CCL18	Gaucher disease			12969956	78	2004-01-01	https://pubmed.ncbi.nlm.nih.gov/?term=12969956
We suspect that reduced expression of M-CSF might lead to the impaired self-renewal observed in Gba^−/− NSCs.	NA	NA	NA	M-CSF	observed	Gba	body_results	Defective Self-Renewal and Differentiation of GBA-Deficient Neural Stem Cells Can Be Restored By Macrophage Colony-Stimulating Factor.////Defective Self-Renewal and Differentiation of GBA-Deficient Neural Stem Cells Can Be Restored By Macrophage Colony-Stimulating Factor.	Molecules and cells	CSF1		Gba		26282862	1	2015-09-01	https://pubmed.ncbi.nlm.nih.gov/?term=26282862
Western blot analyses in L444P GC fibroblasts treated with 0.8 µM celastrol ( C ) or 0.8 µM MG-132 ( D ) for 24 h or 72 h. HSF1 protein expression levels ( E ) in L444P GC cells treated with 0.8 µM celastrol and 0.8 µM MG-132.	NA	in vitro	fibroblasts	GC	treated	HSF1	figure_captions	Chemical and biological approaches synergize to ameliorate protein-folding diseases.////Chemical and biological approaches synergize to ameliorate protein-folding diseases.	Cell	IL6			GC	18775310	170	2008-09-01	https://pubmed.ncbi.nlm.nih.gov/?term=18775310
With regard to the pathogenesis of GD, p38 mitogen-activated protein kinases are believed to act as pro-inflammatory kinases that mediate the production of IL-6 and TNFα [49].	NA	NA	NA	GD	mediate	TNFα////IL-6	body_nonstandard	Are Glucosylceramide-Related Sphingolipids Involved in the Increased Risk for Cancer in Gaucher Disease Patients? Review and Hypotheses.	Cancers	TNF////IL6	GD			32085512	1	2020-02-01	https://pubmed.ncbi.nlm.nih.gov/?term=32085512
M-CSF enhances the self-renewal, proliferation, and neuronal differentiation of Gba^−/− NSCs.	NA	NA	neural stem cells	M-CSF	enhances	Gba	figure_captions	Defective Self-Renewal and Differentiation of GBA-Deficient Neural Stem Cells Can Be Restored By Macrophage Colony-Stimulating Factor.////Defective Self-Renewal and Differentiation of GBA-Deficient Neural Stem Cells Can Be Restored By Macrophage Colony-Stimulating Factor.	Molecules and cells	CSF1		Gba		26282862	1	2015-09-01	https://pubmed.ncbi.nlm.nih.gov/?term=26282862
(A) Gba^−/− NSCs were treated with different concentrations of recombinant murine M-CSF (2-50 ng/ml), and self-renewal was assessed.	NA	in vitro	NA	Gba	treated	M-CSF	figure_captions	Defective Self-Renewal and Differentiation of GBA-Deficient Neural Stem Cells Can Be Restored By Macrophage Colony-Stimulating Factor.////Defective Self-Renewal and Differentiation of GBA-Deficient Neural Stem Cells Can Be Restored By Macrophage Colony-Stimulating Factor.	Molecules and cells	CSF1		Gba		26282862	1	2015-09-01	https://pubmed.ncbi.nlm.nih.gov/?term=26282862
M-CSF affects the proliferation of Gba^−/− NSCs (scale bar, 20 μm).	NA	NA	NA	M-CSF	affects	Gba	figure_captions	Defective Self-Renewal and Differentiation of GBA-Deficient Neural Stem Cells Can Be Restored By Macrophage Colony-Stimulating Factor.////Defective Self-Renewal and Differentiation of GBA-Deficient Neural Stem Cells Can Be Restored By Macrophage Colony-Stimulating Factor.	Molecules and cells	CSF1		Gba		26282862	1	2015-09-01	https://pubmed.ncbi.nlm.nih.gov/?term=26282862
CCL18 is frequently used to monitor GD1 disease.	GD1	NA	NA	CCL18	monitor	GD1 disease	body_introduction	Biochemical response to substrate reduction therapy versus enzyme replacement therapy in Gaucher disease type 1 patients.////Biochemical response to substrate reduction therapy versus enzyme replacement therapy in Gaucher disease type 1 patients.	Orphanet journal of rare diseases	CCL18	GD1 disease			27008851	12	2016-03-01	https://pubmed.ncbi.nlm.nih.gov/?term=27008851
(CCL2) were found in the lung tissue of Gba1 point-mutated mice^	NA	mouse model	lung	CCL2	found	Gba1	body_nonstandard	Immunological cells and functions in Gaucher disease.////Immunological cells and functions in Gaucher disease.	Critical reviews in oncogenesis	CCL2		Gba1		23510064	20	2013-01-01	https://pubmed.ncbi.nlm.nih.gov/?term=23510064
Indeed, elevated cytokines found in SARS-CoV-2 (IL-2R, IL-6, IL-10, MIP1-α and TNF-α), are reminiscent of the pattern described in GD [15,24,26].	NA	NA	NA	cytokines	are////described	GD////IL-10////IL-6////MIP1-α////TNF-α	body_nonstandard	Gaucher disease and SARS-CoV-2 infection: Emerging management challenges.	Molecular genetics and metabolism	CCL3////IL10////IL6////TNF////x_cytokine	GD			32471800	2	2020-07-01	https://pubmed.ncbi.nlm.nih.gov/?term=32471800
Using erythroid progenitor cultures derived from peripheral CD34^+ cells, we also demonstrated that GD1 patients exhibit ineffective erythropoiesis with increased plasma levels of erythropoietin (EPO) and GDF15 factor.^7	GD1	in vitro	erythroid progenitor cells	EPO////erythropoietin////GD1 patients	exhibit////factor.	EPO////erythropoietin////GDF15	body_introduction	Involvement of hepcidin in iron metabolism dysregulation in Gaucher disease.////Involvement of hepcidin in iron metabolism dysregulation in Gaucher disease.	Haematologica	EPO////GDF15	GD1 patients			29305416	4	2018-04-01	https://pubmed.ncbi.nlm.nih.gov/?term=29305416
Age-dependent progressive accumulation of GC and enhanced MΦ activation and immune response genes (i.e., INFγ, TNF, IL-1ra, IL-4, IL-6, CCL2, CCL3, CCL6, CCL9, CXCL1, CXCL12, CCL17, and CCL22) have been observed in lungs and livers of viable Gba1 point-mutated mice.^26	NA	mouse model	lung;liver	CCL17////CCL2////CCL22////CCL3////CCL6////CCL9////CXCL1////CXCL12////GC////IL-1ra////IL-4////IL-6////TNF	observed	Gba1	body_nonstandard	Immunological cells and functions in Gaucher disease.////Immunological cells and functions in Gaucher disease.	Critical reviews in oncogenesis	CCL17////CCL2////CCL22////CCL3////CCL6////CCL9////CXCL1////CXCL12////IL1RN////IL4////IL6////TNF		Gba1	GC	23510064	20	2013-01-01	https://pubmed.ncbi.nlm.nih.gov/?term=23510064
Given the similarity of the storage cells in NPD and Gaucher disease, we studied Gaucher plasma markers (chitotriosidase and CCL18) in two siblings homozygous for the R228C mutation in acid sphingomyelinase (ASM) and a type B course of NPD.	NA	patients	plasma	Gaucher disease	studied	CCL18////Gaucher	abstracts	Plasma chitotriosidase and CCL18: early biochemical surrogate markers in type B Niemann-Pick disease.////Plasma chitotriosidase and CCL18: early biochemical surrogate markers in type B Niemann-Pick disease.	Journal of inherited metabolic disease	CCL18	Gaucher////Gaucher disease			15702402	18	2005-01-01	https://pubmed.ncbi.nlm.nih.gov/?term=15702402
CCL18: a urinary marker of Gaucher cell burden in Gaucher patients.	NA	patients	urine	CCL18////Gaucher cell	marker	Gaucher cell////Gaucher patients	titles	CCL18: a urinary marker of Gaucher cell burden in Gaucher patients.////CCL18: a urinary marker of Gaucher cell burden in Gaucher patients.	Journal of inherited metabolic disease	CCL18	Gaucher cell////Gaucher patients			16736095	9	2006-08-01	https://pubmed.ncbi.nlm.nih.gov/?term=16736095
Therefore, urinary PARC/CCL18 excretion offers insight into the body burden of Gaucher cells	NA	NA	urine	CCL18////PARC	offers	Gaucher cells	body_nonstandard	Biomarkers in the diagnosis of lysosomal storage disorders: proteins, lipids, and inhibodies.////Biomarkers in the diagnosis of lysosomal storage disorders: proteins, lipids, and inhibodies.	Journal of inherited metabolic disease	CCL18	Gaucher cells			21445610	32	2011-06-01	https://pubmed.ncbi.nlm.nih.gov/?term=21445610
Finally, the proliferative effect of EPO on GD cells was verified.	NA	in vitro	NA	EPO	effect	GD cells	abstracts	Protective effect of recombinant human erythropoietin in type II Gaucher disease patient cells by scavenging endoplasmic reticulum stress.////Protective effect of recombinant human erythropoietin in type II Gaucher disease patient cells by scavenging endoplasmic reticulum stress.	Biomedicine & pharmacotherapy = Biomedecine & pharmacotherapie	EPO	GD cells			21775095		2011-08-01	https://pubmed.ncbi.nlm.nih.gov/?term=21775095
Gaucher cells produce CCL18	NA	NA	gaucher cells	Gaucher cells	produce	CCL18	body_nonstandard	A Review of Gaucher Disease Pathophysiology, Clinical Presentation and Treatments.////A Review of Gaucher Disease Pathophysiology, Clinical Presentation and Treatments.	International journal of molecular sciences	CCL18	Gaucher cells			28218669	64	2017-02-01	https://pubmed.ncbi.nlm.nih.gov/?term=28218669
Interleukin-18 and monocyte macrophage colony-stimulating factor are cytokines mainly involved in the mechanism of bone disease, while macrophage colony-stimulating factor and tumor necrosis factor-alpha may play a role in the development of hematological abnormalities in Gaucher disease.	NA	NA	NA	Interleukin-18////macrophage colony-stimulating factor////tumor necrosis factor-alpha	are cytokines////play	cytokines////Gaucher disease	abstracts	Roles of specific cytokines in bone remodeling and hematopoiesis in Gaucher disease.////Roles of specific cytokines in bone remodeling and hematopoiesis in Gaucher disease.	Pediatrics international : official journal of the Japan Pediatric Society	CSF1////IL18////TNF////x_cytokine	Gaucher disease			18045304	9	2007-12-01	https://pubmed.ncbi.nlm.nih.gov/?term=18045304
Crucially, levels of IFNβ were also elevated in the two available cerebella of human patients who succumbed to type 2 GD (Fig. 1e).	GD2	patients	cerebellum	IFNβ	succumbed	type 2 GD	body_results	Induction of the type I interferon response in neurological forms of Gaucher disease.////Induction of the type I interferon response in neurological forms of Gaucher disease.	Journal of neuroinflammation	IFNB1	type 2 GD			27175482	10	2016-05-01	https://pubmed.ncbi.nlm.nih.gov/?term=27175482
Elevations of IL-1, IL-6, IL-10, CCL18, and TNF-α have been reported in sera of GD1 patients.^	GD1	patients	serum	CCL18////IL-1////IL-10////IL-6////TNF-α	reported	GD1	body_nonstandard	Gaucher disease and malignancy: a model for cancer pathogenesis in an inborn error of metabolism.////Gaucher disease and malignancy: a model for cancer pathogenesis in an inborn error of metabolism.	Critical reviews in oncogenesis	CCL18////IL10////IL6////Interleukin-1////TNF	GD1			23510066	27	2013-01-01	https://pubmed.ncbi.nlm.nih.gov/?term=23510066
Evaluation of CXCR4, the SDF1α receptor, revealed reduced expression of surface CXCR4 on GD-derived monocytes, despite similar CXCR4 mRNA transcript levels in the monocytes of healthy volunteers and GD patients.	NA	patients	monocytes	CXCR4////SDF1α	Evaluation////expression////revealed	CXCR4////GD////SDF1α	abstracts	Impaired migration capacity in monocytes derived from patients with Gaucher disease.////Impaired migration capacity in monocytes derived from patients with Gaucher disease.	Blood cells, molecules & diseases	CXCL12////CXCR4	GD			25564295	2	2015-08-01	https://pubmed.ncbi.nlm.nih.gov/?term=25564295
F6: Recombinant GCase, isofagomine and ambroxol induce IL-10 and reverse the elevation of ChT1 activity in GD hiPSC macrophages .	NA	in vitro	macrophages	GCase	induce////reverse	GD////IL-10	figure_captions	Gaucher iPSC-derived macrophages produce elevated levels of inflammatory mediators and serve as a new platform for therapeutic development.////Gaucher iPSC-derived macrophages produce elevated levels of inflammatory mediators and serve as a new platform for therapeutic development.	Stem cells (Dayton, Ohio)	IL10	GD	GCase		24801745	22	2014-09-01	https://pubmed.ncbi.nlm.nih.gov/?term=24801745
Gaucher cells produce CCL18 and it is found at high levels in plasma.	NA	NA	gaucher cells; plasma	Gaucher cells	produce	CCL18	body_nonstandard	A Review of Gaucher Disease Pathophysiology, Clinical Presentation and Treatments.////A Review of Gaucher Disease Pathophysiology, Clinical Presentation and Treatments.	International journal of molecular sciences	CCL18	Gaucher cells			28218669	64	2017-02-01	https://pubmed.ncbi.nlm.nih.gov/?term=28218669
GD hiPSC-derived macrophages expressed higher levels of tumor necrosis factor a, IL-6, and IL-1b than control cells, and this phenotype was exacerbated by treatment with lipopolysaccharide.	NA	in vitro	macrophages	GD	expressed	IL-1b////IL-6////tumor necrosis factor	abstracts	Gaucher iPSC-derived macrophages produce elevated levels of inflammatory mediators and serve as a new platform for therapeutic development.////Gaucher iPSC-derived macrophages produce elevated levels of inflammatory mediators and serve as a new platform for therapeutic development.	Stem cells (Dayton, Ohio)	IL1B////IL6////Tumor Necrosis Factors	GD			24801745	22	2014-09-01	https://pubmed.ncbi.nlm.nih.gov/?term=24801745
Glucosylsphingosine is significantly more accurate than Chitotriosidase (A: p = 0.027, n = 228) and CCL18 (B: p<0.001, n = 207).	NA	NA	NA	Glucosylsphingosine	is accurate	CCL18	figure_captions	Glucosylsphingosine is a highly sensitive and specific biomarker for primary diagnostic and follow-up monitoring in Gaucher disease in a non-Jewish, Caucasian cohort of Gaucher disease patients.////Glucosylsphingosine is a highly sensitive and specific biomarker for primary diagnostic and follow-up monitoring in Gaucher disease in a non-Jewish, Caucasian cohort of Gaucher disease patients.	PloS one	CCL18			Glucosylsphingosine	24278166	47	2013-01-01	https://pubmed.ncbi.nlm.nih.gov/?term=24278166
Here, increased levels of I-309, MCP-5, CXCL-2, CXCL-9, CXCL-10, CXCL-11, CXCL-13, and their corresponding leukocytes, i.e., MOs (monocytes), Mфs, dendritic cells (DCs), polymorphonuclear neutrophils (PMNs), and T, and B cells were identified in the circulation of mice with Gba1 mutations (D409V/null).	NA	mouse model	blood	CXCL-10////CXCL-11////CXCL-13////CXCL-9////I-309////MCP-5	identified	Gba1	abstracts	Gaucher disease: chemotactic factors and immunological cell invasion in a mouse model.////Gaucher disease: chemotactic factors and immunological cell invasion in a mouse model.	Molecular genetics and metabolism	CCL1////CCL12////CXCL10////CXCL11////CXCL13////CXCL9		Gba1		24079945	7	2014-02-01	https://pubmed.ncbi.nlm.nih.gov/?term=24079945
In addition, we found that activation of the inflammasome, a multiprotein complex that activates caspase-1, led to the maturation of IL-1β in Gaucher macrophages.	NA	NA	macrophages	IL-1β	maturation	Gaucher	abstracts	Lysosomal storage and impaired autophagy lead to inflammasome activation in Gaucher macrophages.////Lysosomal storage and impaired autophagy lead to inflammasome activation in Gaucher macrophages.	Aging cell	IL1B	Gaucher			26486234	36	2016-02-01	https://pubmed.ncbi.nlm.nih.gov/?term=26486234
In conclusion, our data suggests that in vitro GCASE deficiency, along with concomitant glucosylceramide accumulation, generates a state of osteoclastogenesis mediated in part by pro-resorptive cytokines, especially TNF-a.	NA	in vitro	NA	GCASE	generates////mediated	cytokines////glucosylceramide////TNF-a	abstracts	Induction of osteoclastogenesis in an in vitro model of Gaucher disease is mediated by T cells via TNF-α.////Induction of osteoclastogenesis in an in vitro model of Gaucher disease is mediated by T cells via TNF-a.	Gene	TNF////x_cytokine		GCASE	glucosylceramide	23010424	10	2012-11-01	https://pubmed.ncbi.nlm.nih.gov/?term=23010424
In GD patient sera C5a levels were increased, GlcCer specific auto-antibodies were present and in vitro GlcCer IC induced C5a, CCL18 and several pro inflammatory cytokines in U937 cells [64].	NA	patients	serum	GlcCer////GD patient	induced////increased	CCL18////cytokines	body_nonstandard	Lyso-glycosphingolipids: presence and consequences.	Essays in biochemistry	CCL18////x_cytokine	GD patient		GlcCer	32808655		2020-09-01	https://pubmed.ncbi.nlm.nih.gov/?term=32808655
Induction of osteoclastogenesis in an in vitro model of Gaucher disease is mediated by T cells via TNF-α.	NA	in vitro	NA	Gaucher disease	mediated	TNF-α	titles	Induction of osteoclastogenesis in an in vitro model of Gaucher disease is mediated by T cells via TNF-α.////Induction of osteoclastogenesis in an in vitro model of Gaucher disease is mediated by T cells via TNF-a.	Gene	TNF	Gaucher disease			23010424	10	2012-11-01	https://pubmed.ncbi.nlm.nih.gov/?term=23010424
It was further found that plasma glucosylsphingosine levels correlate with established GCs plasma markers, chitotriosidase (ρ = 0.66) and CCL18 (ρ = 0.40) [18].	NA	NA	plasma	glucosylsphingosine	correlate	CCL18	body_nonstandard	Defective Sphingolipids Metabolism and Tumor Associated Macrophages as the Possible Links Between Gaucher Disease and Blood Cancer Development.////Defective Sphingolipids Metabolism and Tumor Associated Macrophages as the Possible Links Between Gaucher Disease and Blood Cancer Development.	International journal of molecular sciences	CCL18			glucosylsphingosine	30781349	2	2019-02-01	https://pubmed.ncbi.nlm.nih.gov/?term=30781349
Plasma glucosylsphingosine levels correlate with established plasma markers of Gaucher cells, chitotriosidase (ρ = 0.66) and CCL18 (ρ = 0.40).	NA	NA	plasma	glucosylsphingosine	correlate	CCL18////Gaucher cells	abstracts	Elevated plasma glucosylsphingosine in Gaucher disease: relation to phenotype, storage cell markers, and therapeutic response.////Elevated plasma glucosylsphingosine in Gaucher disease: relation to phenotype, storage cell markers, and therapeutic response.	Blood	CCL18	Gaucher cells		glucosylsphingosine	21868580	69	2011-10-01	https://pubmed.ncbi.nlm.nih.gov/?term=21868580
It was further found that plasma glucosylsphingosine levels correlate with established GCs plasma markers, chitotriosidase (ρ = 0.66) and CCL18 (ρ = 0.40)	NA	NA	plasma	glucosylsphingosine	correlate	CCL18	body_nonstandard	Defective Sphingolipids Metabolism and Tumor Associated Macrophages as the Possible Links Between Gaucher Disease and Blood Cancer Development.////Defective Sphingolipids Metabolism and Tumor Associated Macrophages as the Possible Links Between Gaucher Disease and Blood Cancer Development.	International journal of molecular sciences	CCL18			glucosylsphingosine	30781349	2	2019-02-01	https://pubmed.ncbi.nlm.nih.gov/?term=30781349
Mϕ, and, unexpectedly, DCs, PMNs, and T cells, from 9V/null mice showed excess glucosylceramides as potential bases for activation of APCs and T cells to induce Th1 (IFNγ, IL12, TNFα,) and Th17	NA	mouse model	NA	glucosylceramides	induce	IFNγ////IL12////TNFα	abstracts	Immunological cell type characterization and Th1-Th17 cytokine production in a mouse model of Gaucher disease.////Immunological cell type characterization and Th1-Th17 cytokine production in a mouse model of Gaucher disease.	Molecular genetics and metabolism	IFNG////Interleukin-12////TNF			glucosylceramides	22595426	12	2012-07-01	https://pubmed.ncbi.nlm.nih.gov/?term=22595426
Plasma lyso-GL1 was significantly correlated with CCL18 (r = 0.62 p<0.001, Figure 1E) and with indicators of severity of visceral disease: splenic volume (r = 0.27 p= 0.003, Figure 1I), liver volume (r = 0.28 p<0.001 Figure 1H) as well as with age (r = −0.22 p < 0.001 Figure 1F).	NA	NA	plasma	lyso-GL1	correlated	CCL18	body_results	Glucosylsphingosine is a key biomarker of Gaucher disease.////Glucosylsphingosine is a key biomarker of Gaucher disease.	American journal of hematology	CCL18			lyso-GL1	27441734	32	2016-11-01	https://pubmed.ncbi.nlm.nih.gov/?term=27441734
Plasma PARC/CCL18 levels are 10- to 40-fold elevated in symptomatic Gaucher patients (Boot et al. 2004; Deegan et al. 2005).	NA	patients	NA	CCL18////PARC	are elevated	Gaucher patients	body_nonstandard	Biomarkers in the diagnosis of lysosomal storage disorders: proteins, lipids, and inhibodies.////Biomarkers in the diagnosis of lysosomal storage disorders: proteins, lipids, and inhibodies.	Journal of inherited metabolic disease	CCL18	Gaucher patients			21445610	32	2011-06-01	https://pubmed.ncbi.nlm.nih.gov/?term=21445610
The cellular changes in GCase deficiency were accompanied by elevated T-helper (Th)1 and Th2 cytokines that tracked with disease severity.	NA	NA	NA	GCase	accompanied	Th2 cytokines	body_nonstandard	Lysosomal Storage Disorders and Malignancy.////Lysosomal Storage Disorders and Malignancy.	Diseases (Basel, Switzerland)	Th2 cytokine		GCase		28933361	2	2017-02-01	https://pubmed.ncbi.nlm.nih.gov/?term=28933361
The cellular changes in GCase deficiency were accompanied by elevated T-helper (Th)1 and Th2 cytokines that also tracked with disease severity.	NA	NA	NA	GCase	accompanied	Th2 cytokines	abstracts	Gaucher disease gene GBA functions in immune regulation.////Gaucher disease gene GBA functions in immune regulation.	Proceedings of the National Academy of Sciences of the United States of America	Th2 cytokine		GCase		22665763	32	2012-06-01	https://pubmed.ncbi.nlm.nih.gov/?term=22665763
The IL-4, IL-13, and TNFα profiles have been reproduced in an in vitro GD model induced by Conduritol B epoxide (CBE) in peripheral blood mononuclear cells (PBMCs)	NA	in vitro	peripheral blood mononuclear cells	IL-13////IL-4////TNFα	reproduced	GD model	body_conclusions	The influence of genetic variability and proinflammatory status on the development of bone disease in patients with Gaucher disease.////The Influence of Genetic Variability and Proinflammatory Status on the Development of Bone Disease in Patients with Gaucher Disease.	PloS one	IL13////IL4////TNF	GD model			25978039	7	2015-01-01	https://pubmed.ncbi.nlm.nih.gov/?term=25978039
We previously showed that GD hiPSC macrophages respond to bacterial LPS, and that the level of induction of TNF alpha mRNA by LPS was significantly higher in GD hiPSC compared to control hiPSC macrophages (21).	NA	in vitro	macrophages	TNF alpha	was	GD	body_results	Gaucher iPSC-derived macrophages produce elevated levels of inflammatory mediators and serve as a new platform for therapeutic development.////Gaucher iPSC-derived macrophages produce elevated levels of inflammatory mediators and serve as a new platform for therapeutic development.	Stem cells (Dayton, Ohio)	TNF	GD			24801745	22	2014-09-01	https://pubmed.ncbi.nlm.nih.gov/?term=24801745
While STAT1 expression was not influenced by the Gaucher phenotype or IFNγ stimulation, the IFNγ-induced increase in the tyrosine phosphorylation of STAT1 was significantly attenuated in Gaucher-type cells (Fig. 6, Fig. S10).	NA	NA	gaucher cells	IFNγ	attenuated	Gaucher	body_results	Alterations in the properties of the cell membrane due to glycosphingolipid accumulation in a model of Gaucher disease.////Alterations in the properties of the cell membrane due to glycosphingolipid accumulation in a model of Gaucher disease.	Scientific reports	IFNG	Gaucher			29317695	10	2018-01-01	https://pubmed.ncbi.nlm.nih.gov/?term=29317695
